# Supplementary material for: Signal regulatory protein α dynamically mediates macrophage polarization facilitated alleviation of ischemic diseases
Source: PubMed Central journal article supplement (PMC11662717; doi:10.1186/s13578-024-01325-2), 2024-12-20
Supplement: 13578_2024_1325_MOESM1_ESM.pdf [file 13578_2024_1325_MOESM1_ESM.pdf]

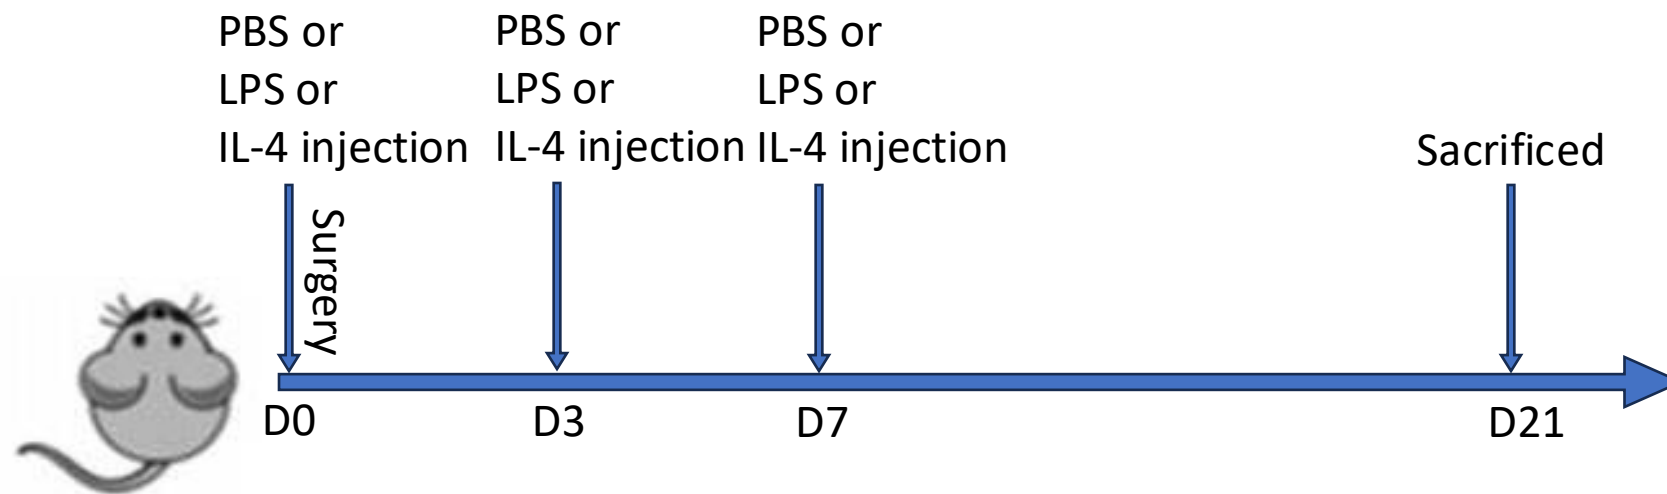

**sFigure 1.** A scheme for the experimental setup of Figure 1.

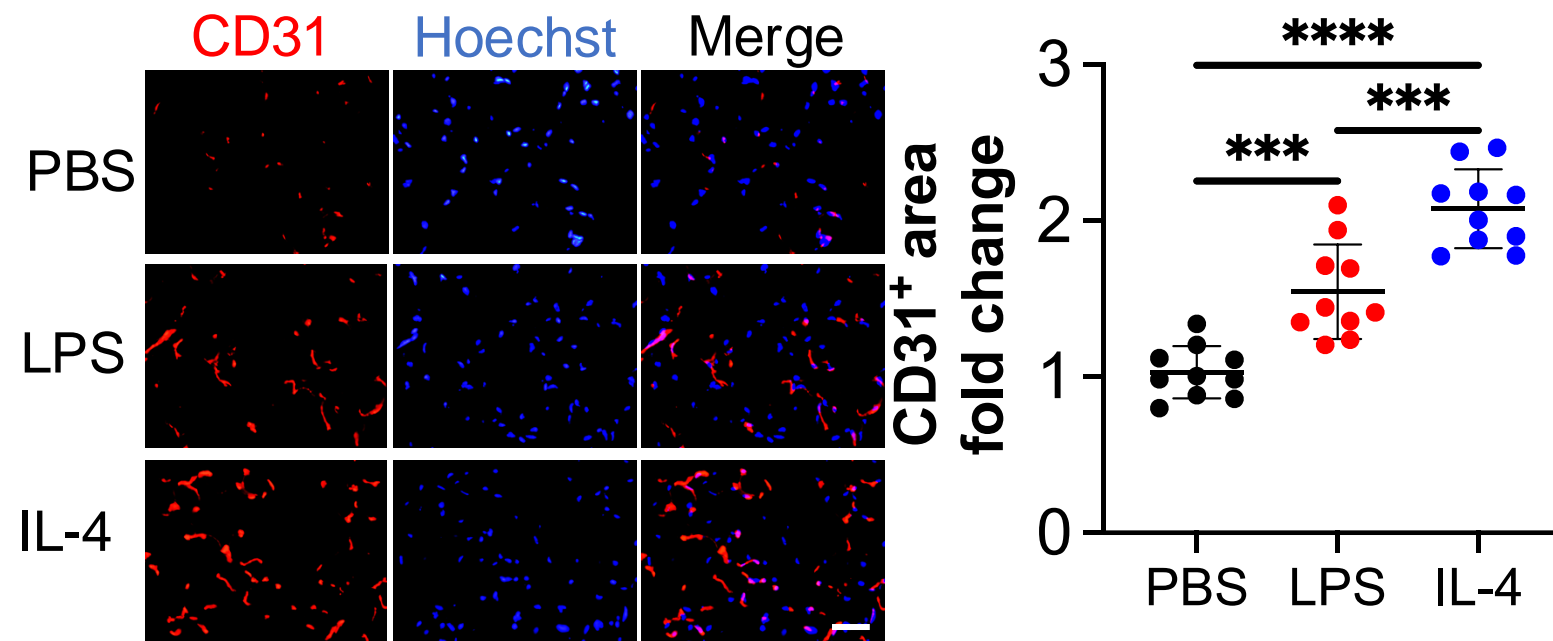

**sFigure 2.** LPS and IL-4 promoted angiogenesis in a mouse HLI model. After left artery ligation, the mice were received PBS, LPS or IL-4 intramuscularly injection (n=10). The mice were euthanized at 21 days post-surgery. The sections of the gastrocnemius muscle from the ligated side were subjected to immunohistochemistry analysis for CD31 and counterstained with Hoechst 33342 (scale bar: 100  $\mu$ m). Quantification of the CD31<sup>+</sup> area. The CD31<sup>+</sup> area on the slide from the mouse administered with PBS was set to 1. Data is analyzed using one-way ANOVA followed by Tukey multiple range test and expressed as mean  $\pm$  SD , \*\*\* $p$ <0.001 and \*\*\*\* $p$ <0.0001.

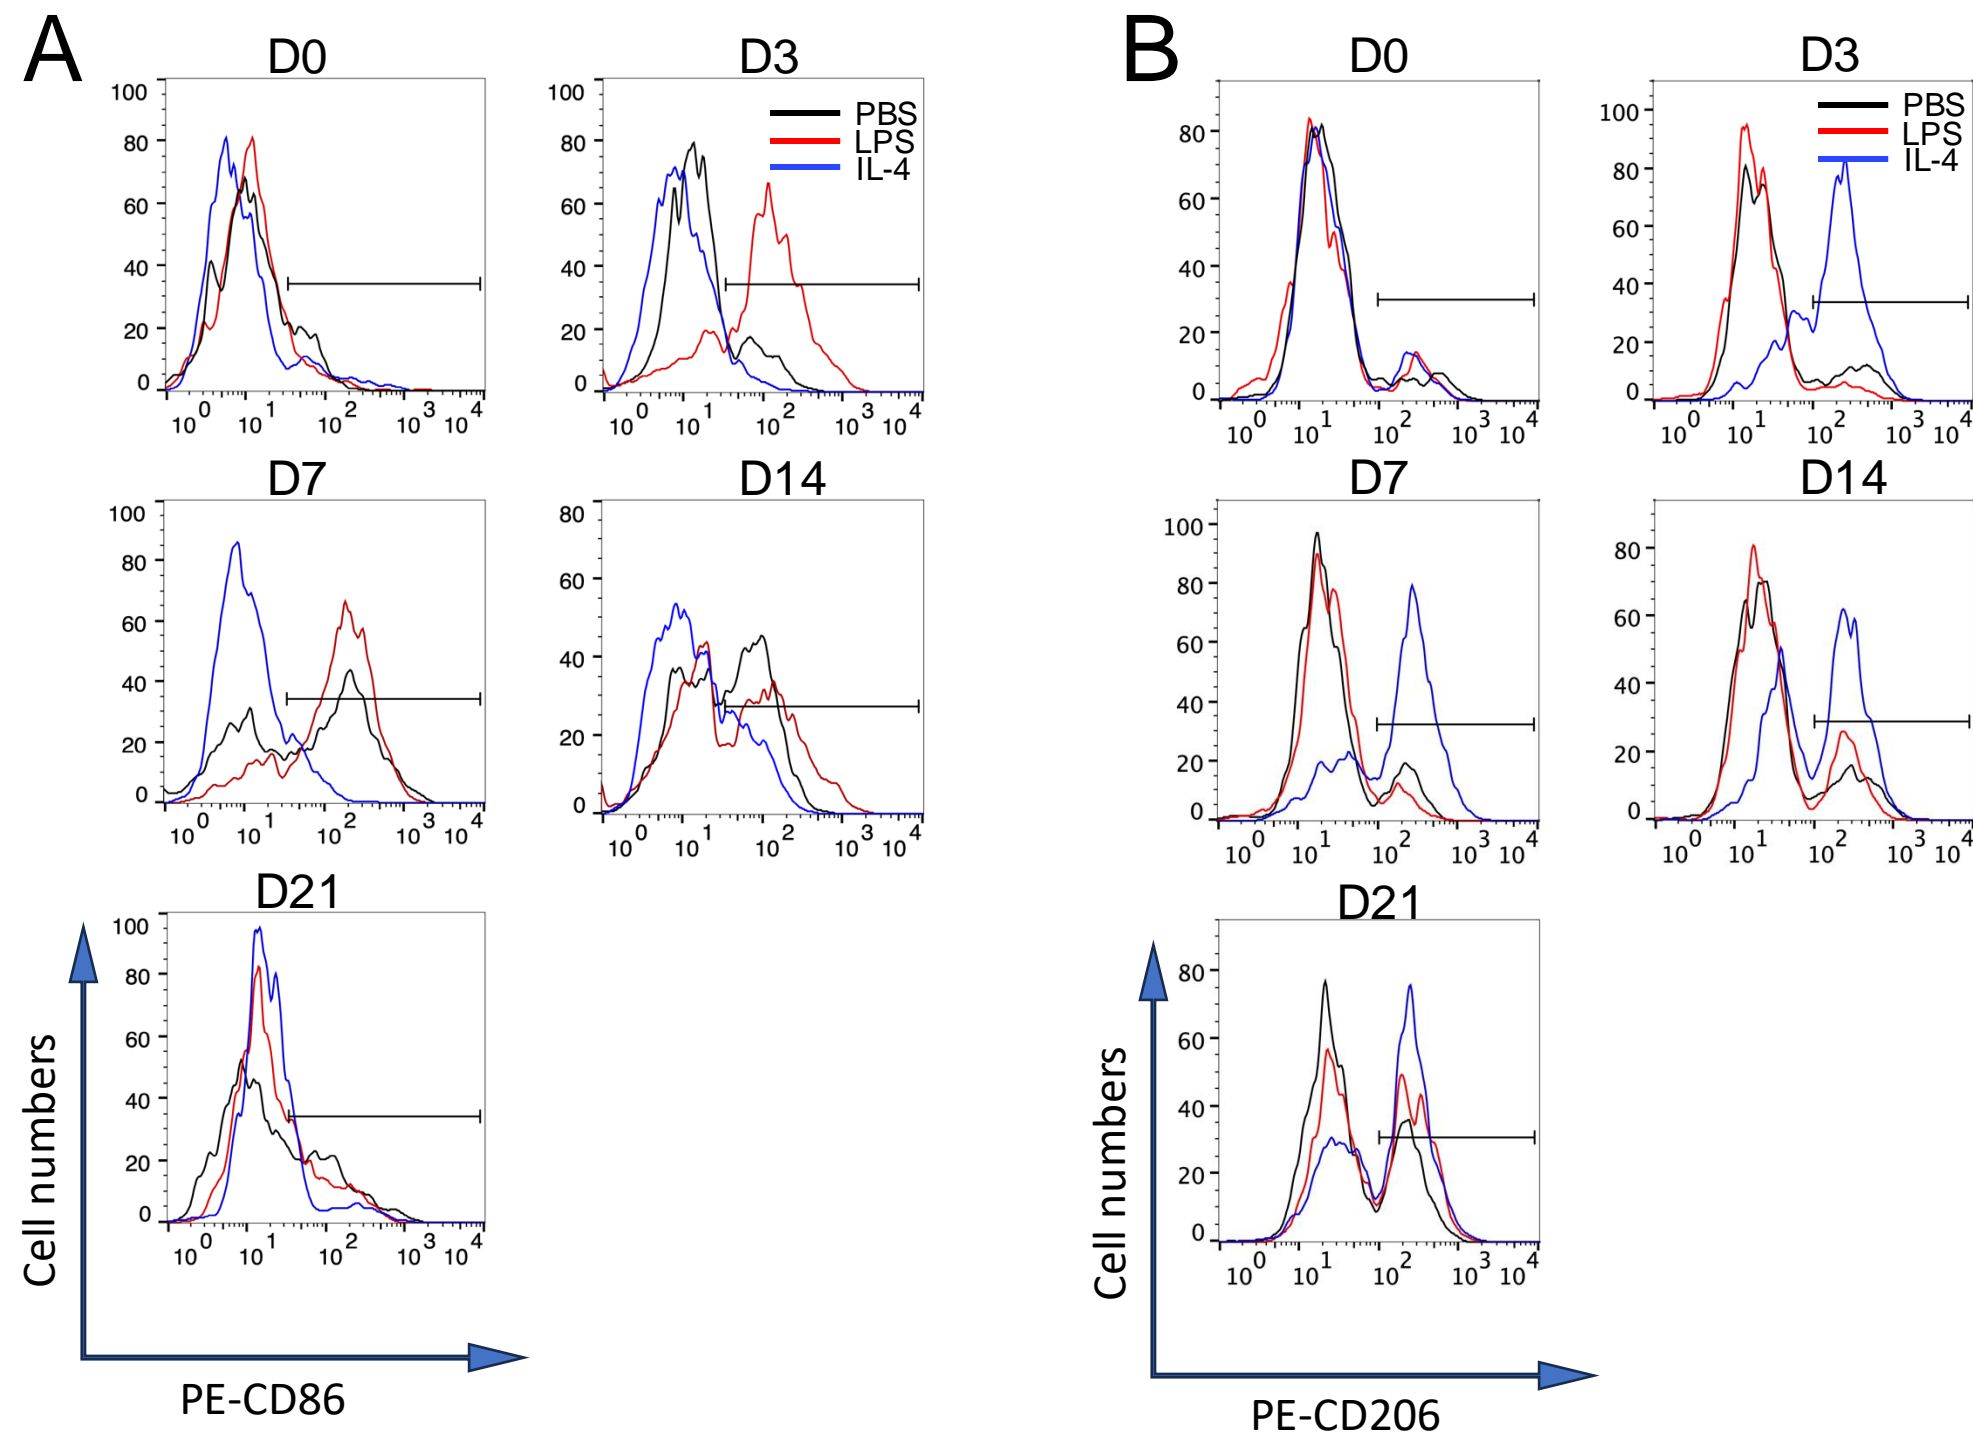

**sFigure 3.** LPS and IL-4 induced macrophage polarization in a mouse HLI model After left artery ligation, the mice received PBS, LPS and IL-4 intramuscular injection on day 0, 3 and 7 post-surgery (n=5). Macrophage were isolated from adductor muscles and the surface markers, CD86 (pro-inflammatory polarization marker, A), and CD206 (anti-inflammatory polarization marker, B) were checked using flow cytometry. Total 5000 cells were gated and analyzed.

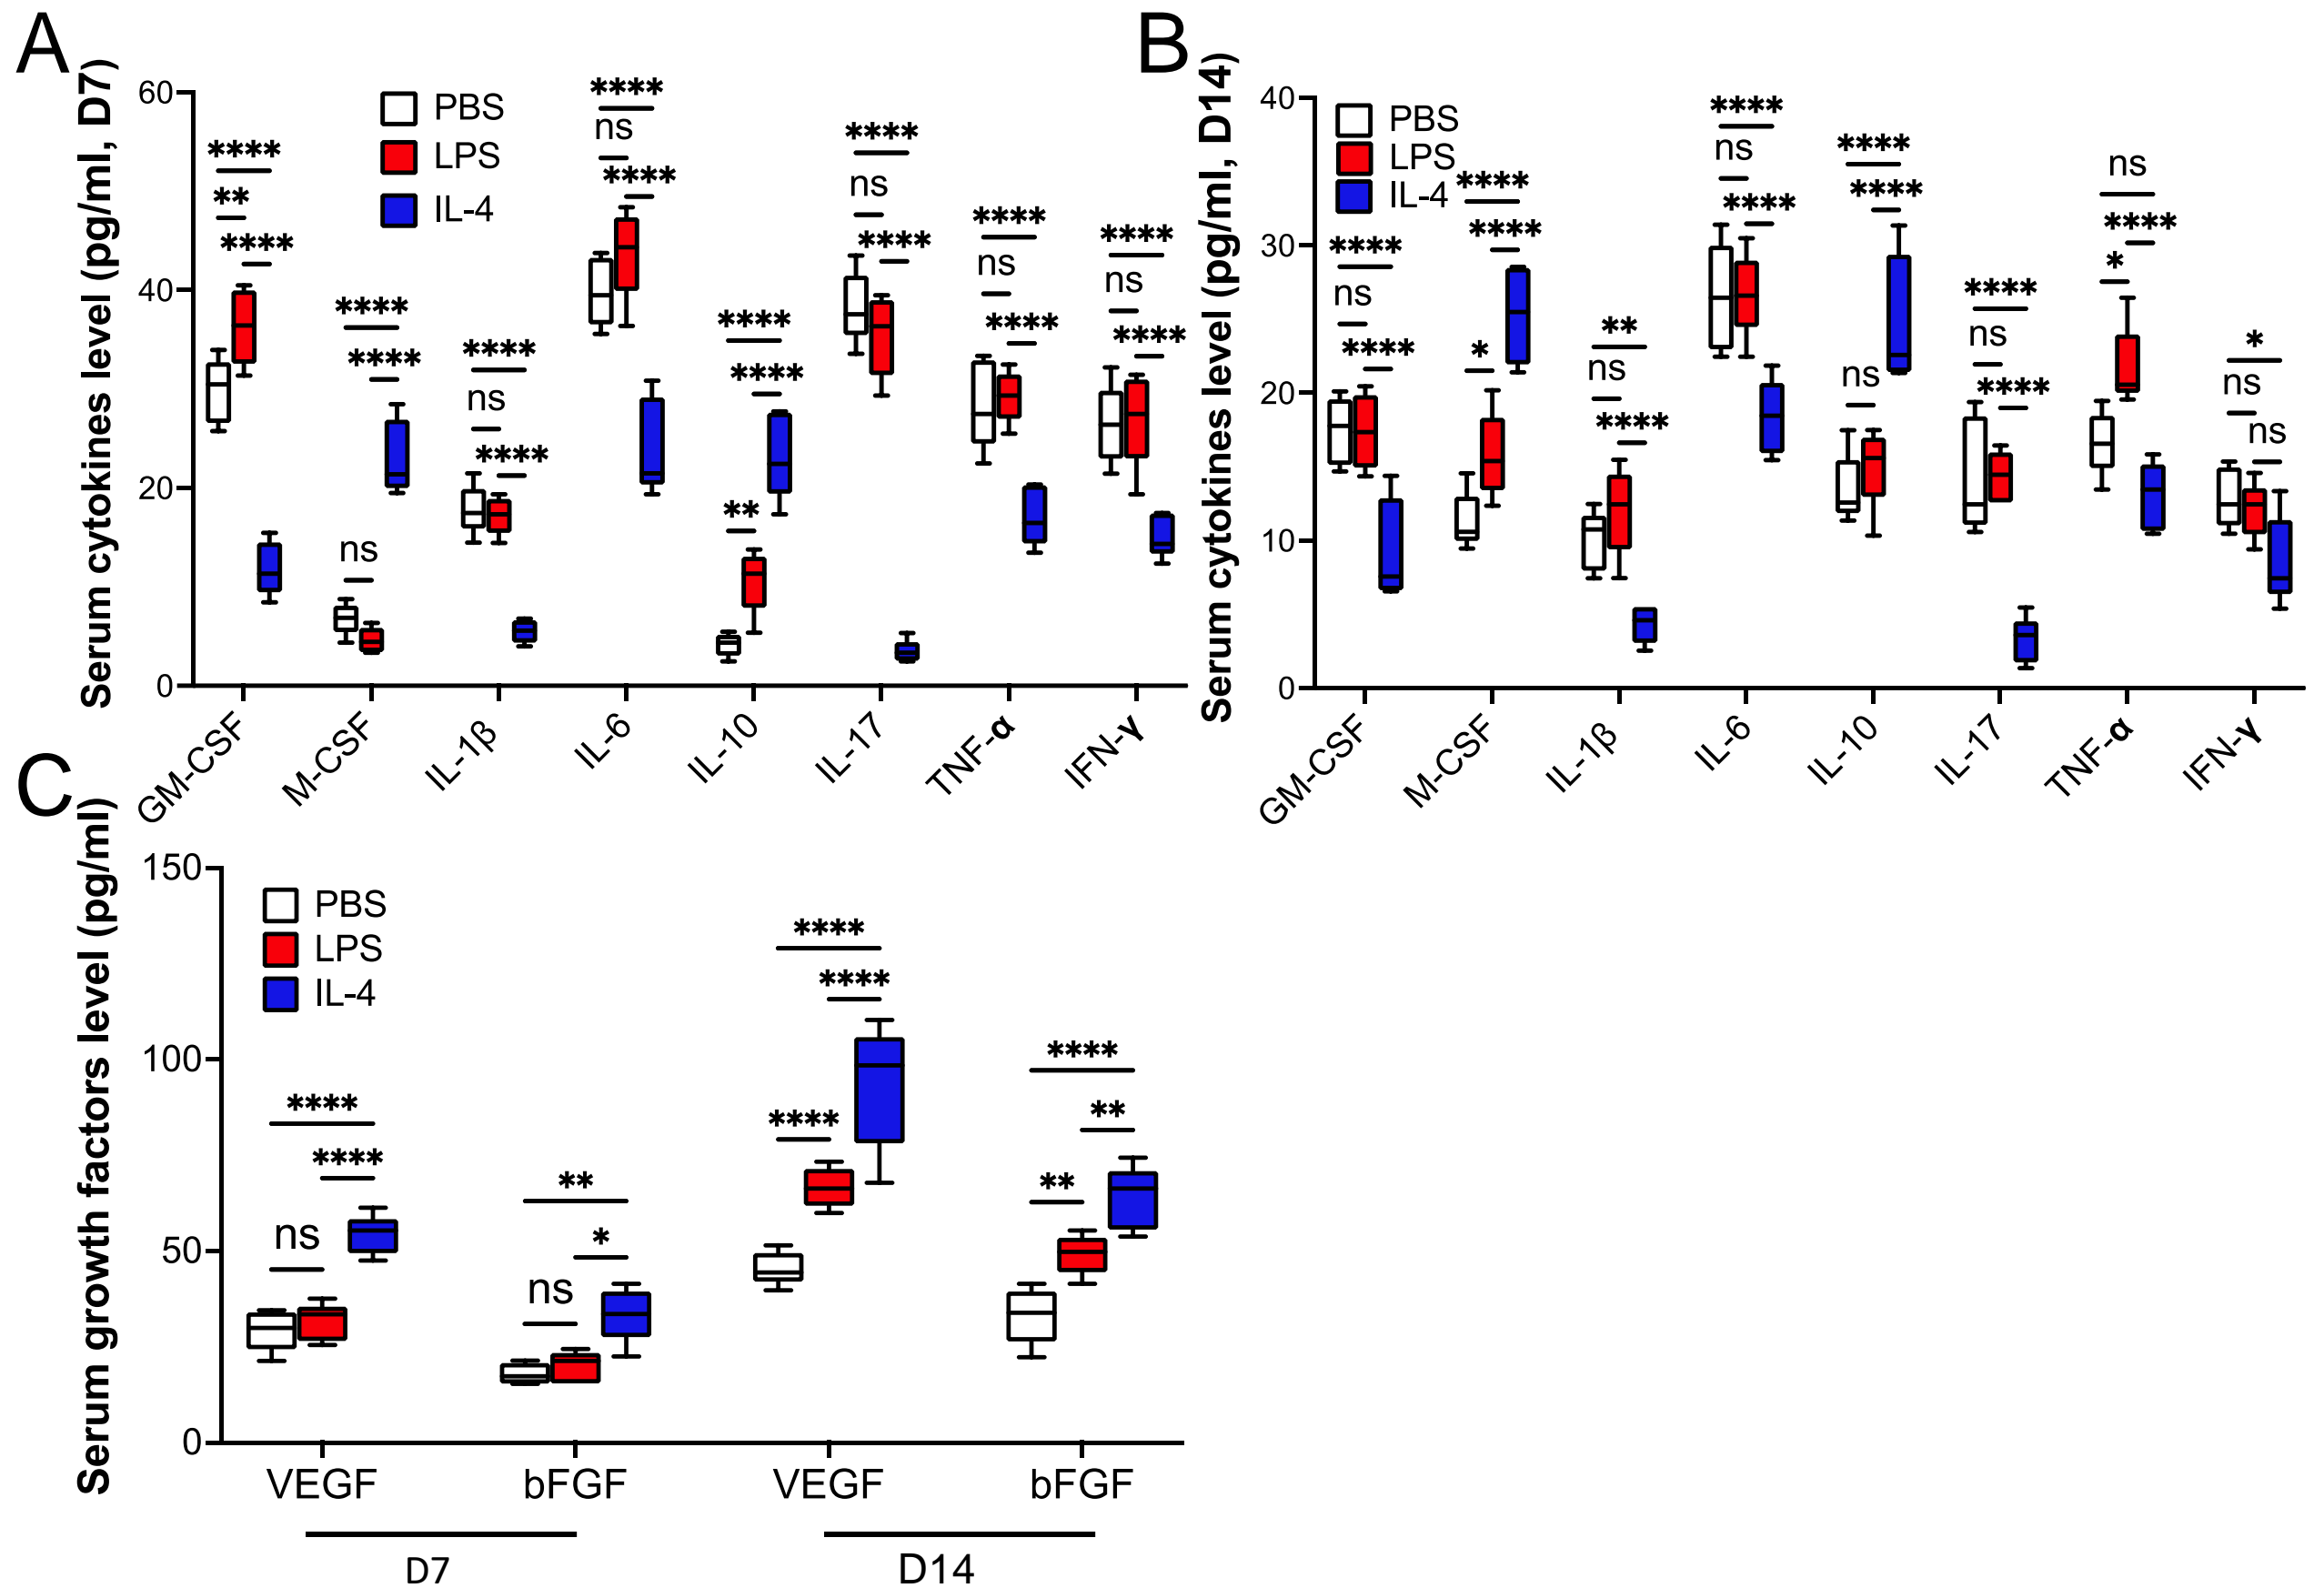

**sFigure 4.** Cytokines and growth factors in the serum from the ischemic mice were received PBS, LPS and IL-4 intramuscularly injection (n=10). The cytokines in the serum on D7 (A) and D14 (B) post-surgery and growth factors (C) in the serum were measured using ELISA. Data is analyzed using one-way ANOVA followed by Tukey multiple range test and expressed as mean  $\pm$  SD, \* $p$ <0.05, \*\* $p$ <0.01, \*\*\* $p$ <0.001 and \*\*\*\* $p$ <0.0001. ns, non-significant.

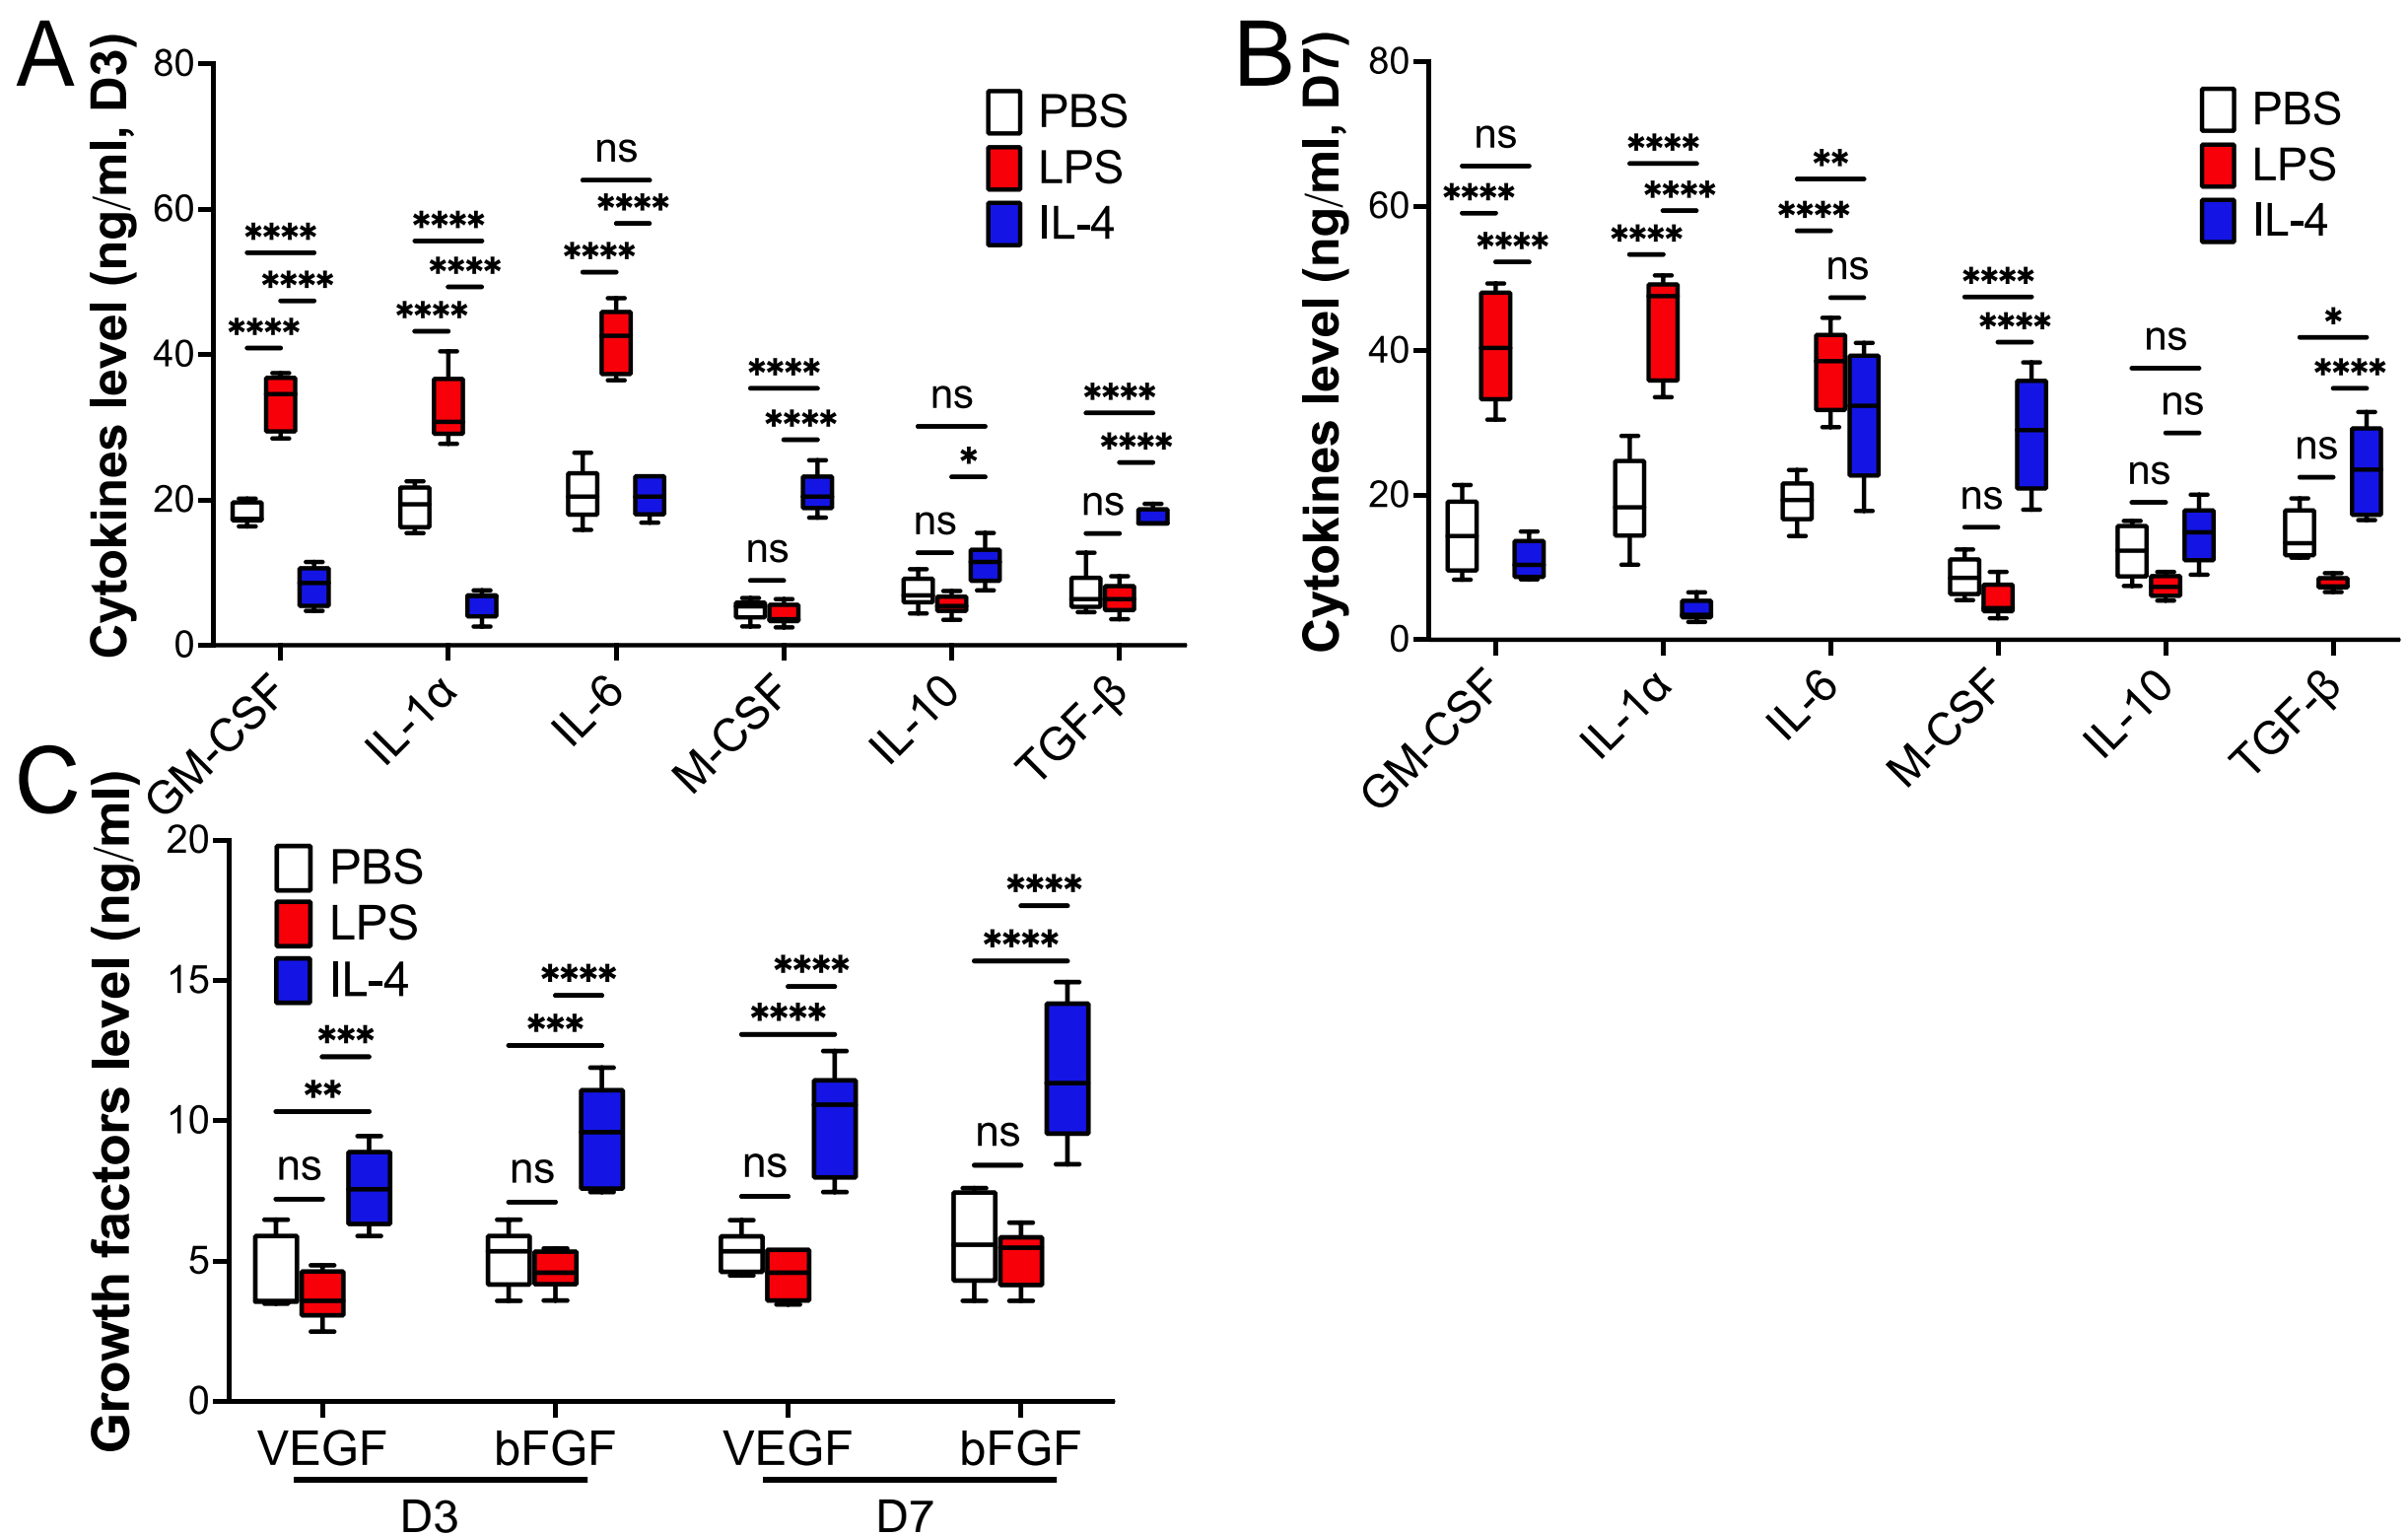

**sFigure 5.** The factors secreted by macrophages collected from adductor muscles of mice on the indicated days post-surgery, were measured using ELISA. **A**, The cytokines secreted by the macrophages, 3 days post-surgery. **B**, the cytokines secreted by the macrophages, 7 days post-surgery. **C**, Growth factors secreted by the macrophages. Data is analyzed using one-way ANOVA followed by Tukey multiple range test and expressed as mean  $\pm$  SD of  $n=5$ , unless specified. \* $p<0.05$ , \*\* $p<0.01$ , \*\*\* $p<0.001$  and \*\*\*\* $p<0.0001$ . ns, non-significant.

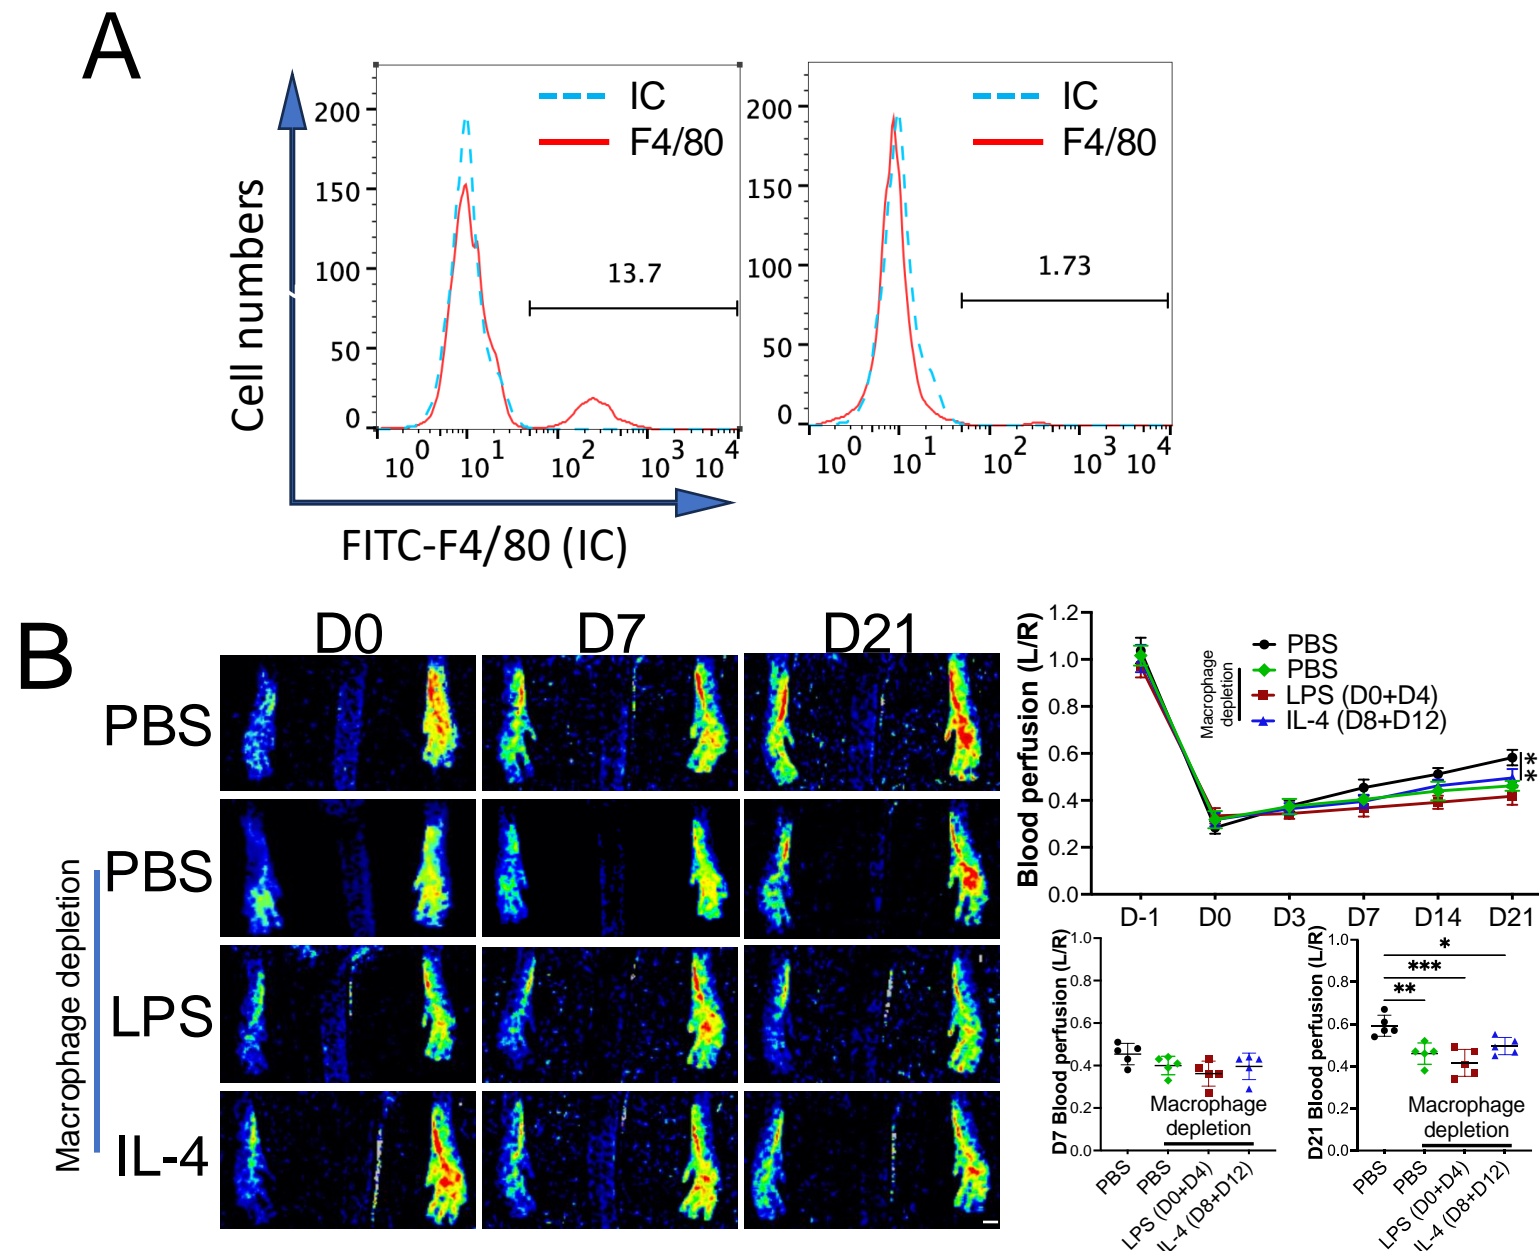

**sFigure 6.** Macrophage depletion attenuated pro-angiogenic effect of LPS or IL-4 in ischemic mice. After left artery ligation, the mice (n=5) that pre-treated with the clodronate-liposomes to deplete pan macrophage, were received PBS, LPS and IL-4 intramuscularly injection at various time. WT mice received PBS were used as a control. **A**, The percentage of the macrophage in spleen of the mice 24h post clodronate-liposomes injection. Total 5000 cells were analyzed. **B**, Laser speckle images showing the relative level of blood perfusion in the hind paws on the indicated days and the quantitative analyses of the laser speckle images showing the left/right ratio of plantar blood perfusion (D7 and D21, scale bar: 1000  $\mu$ m). Data is analyzed using one-way ANOVA followed by Tukey multiple range test and expressed as mean  $\pm$  SD of n=5, unless specified. IC, isotype control, \* $p$ <0.05, \*\* $p$ <0.01 and \*\*\* $p$ <0.001.

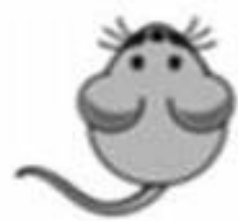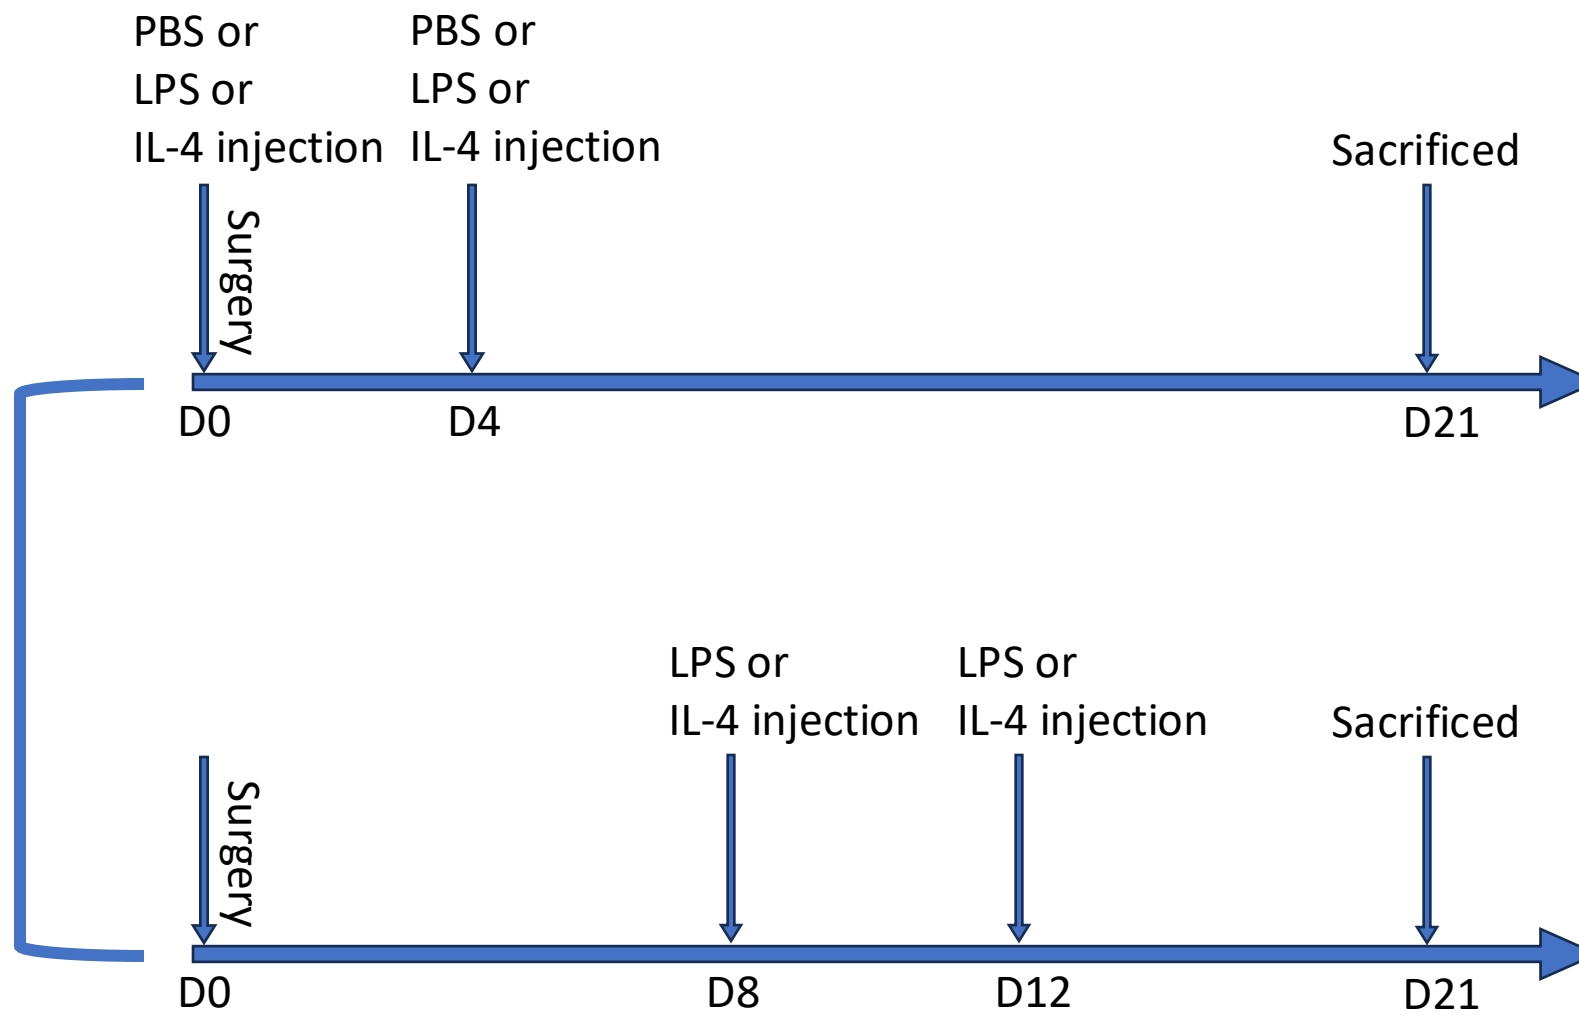

**sFigure 7.** A scheme for the experimental setup of Figure 2.

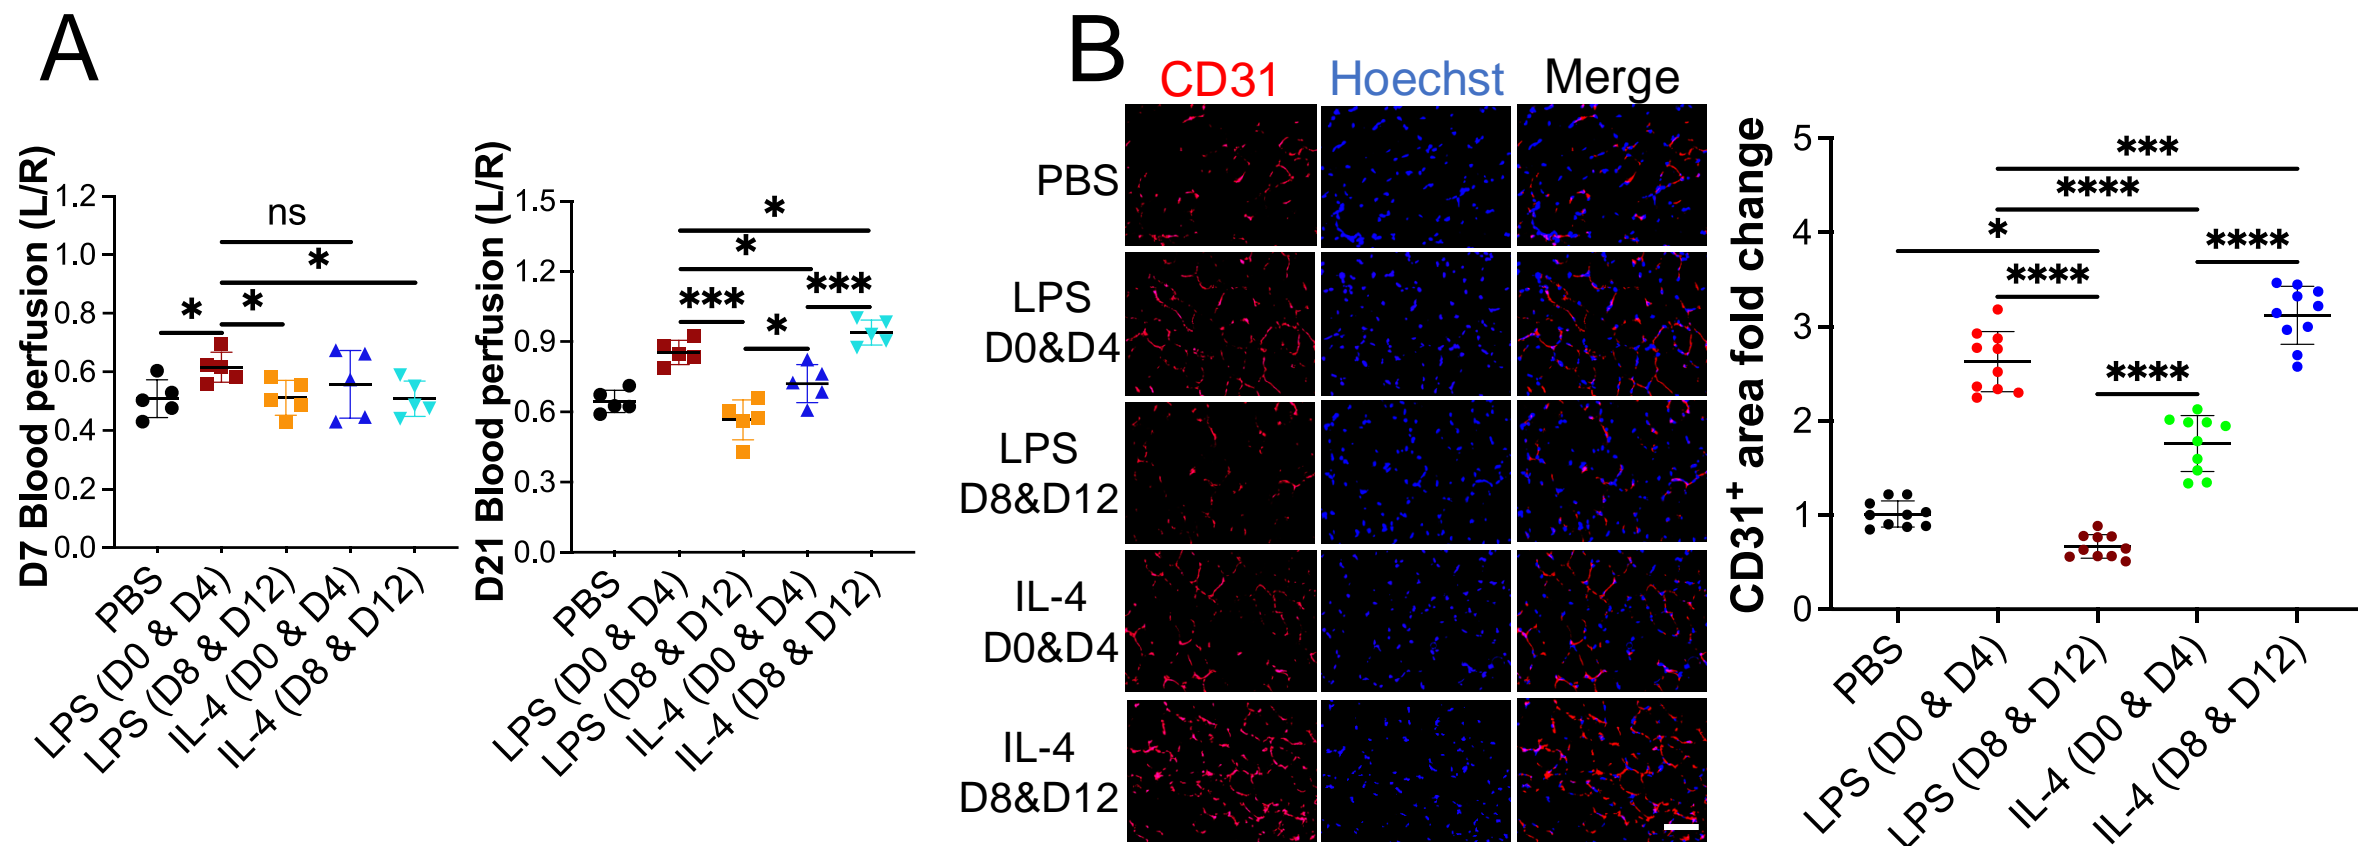

**sFigure 8.** LPS and IL-4 promoted angiogenesis in mouse hindlimb ischemia in a time-dependent manner. After left artery ligation, the mice were received PBS, LPS and IL-4 intramuscularly injection at various time. **A**, Quantitative analyses of the laser speckle images showing the left/right ratio of plantar blood perfusion (D7 and D21, n=5). **B**, The mice were euthanized 21 days post-surgery. The sections of the gastrocnemius muscle from the ligated side were subjected to immunohistochemistry analysis for CD31 and counterstained with Hoechst 33342 (n=10, scale bar: 100  $\mu$ m). Quantification of the CD31<sup>+</sup> area. The CD31<sup>+</sup> area on the slide from the mouse administered with PBS was set to 1. PBS, LPS D0 & D4 or IL-4 D0 & D4: the mice received PBS, LPS or IL-4 intramuscular injection on day 0 and day 4 post-surgery. LPS D8 & D12 or IL-4 D8 & D12: the mice received LPS or IL-4 intramuscular injection on day 8 and day 12 post-surgery. Data is analyzed using one-way ANOVA followed by Tukey multiple range test and expressed as mean  $\pm$  SD, \* $p$ <0.05, \*\*\* $p$ <0.001 and \*\*\*\* $p$ <0.0001.



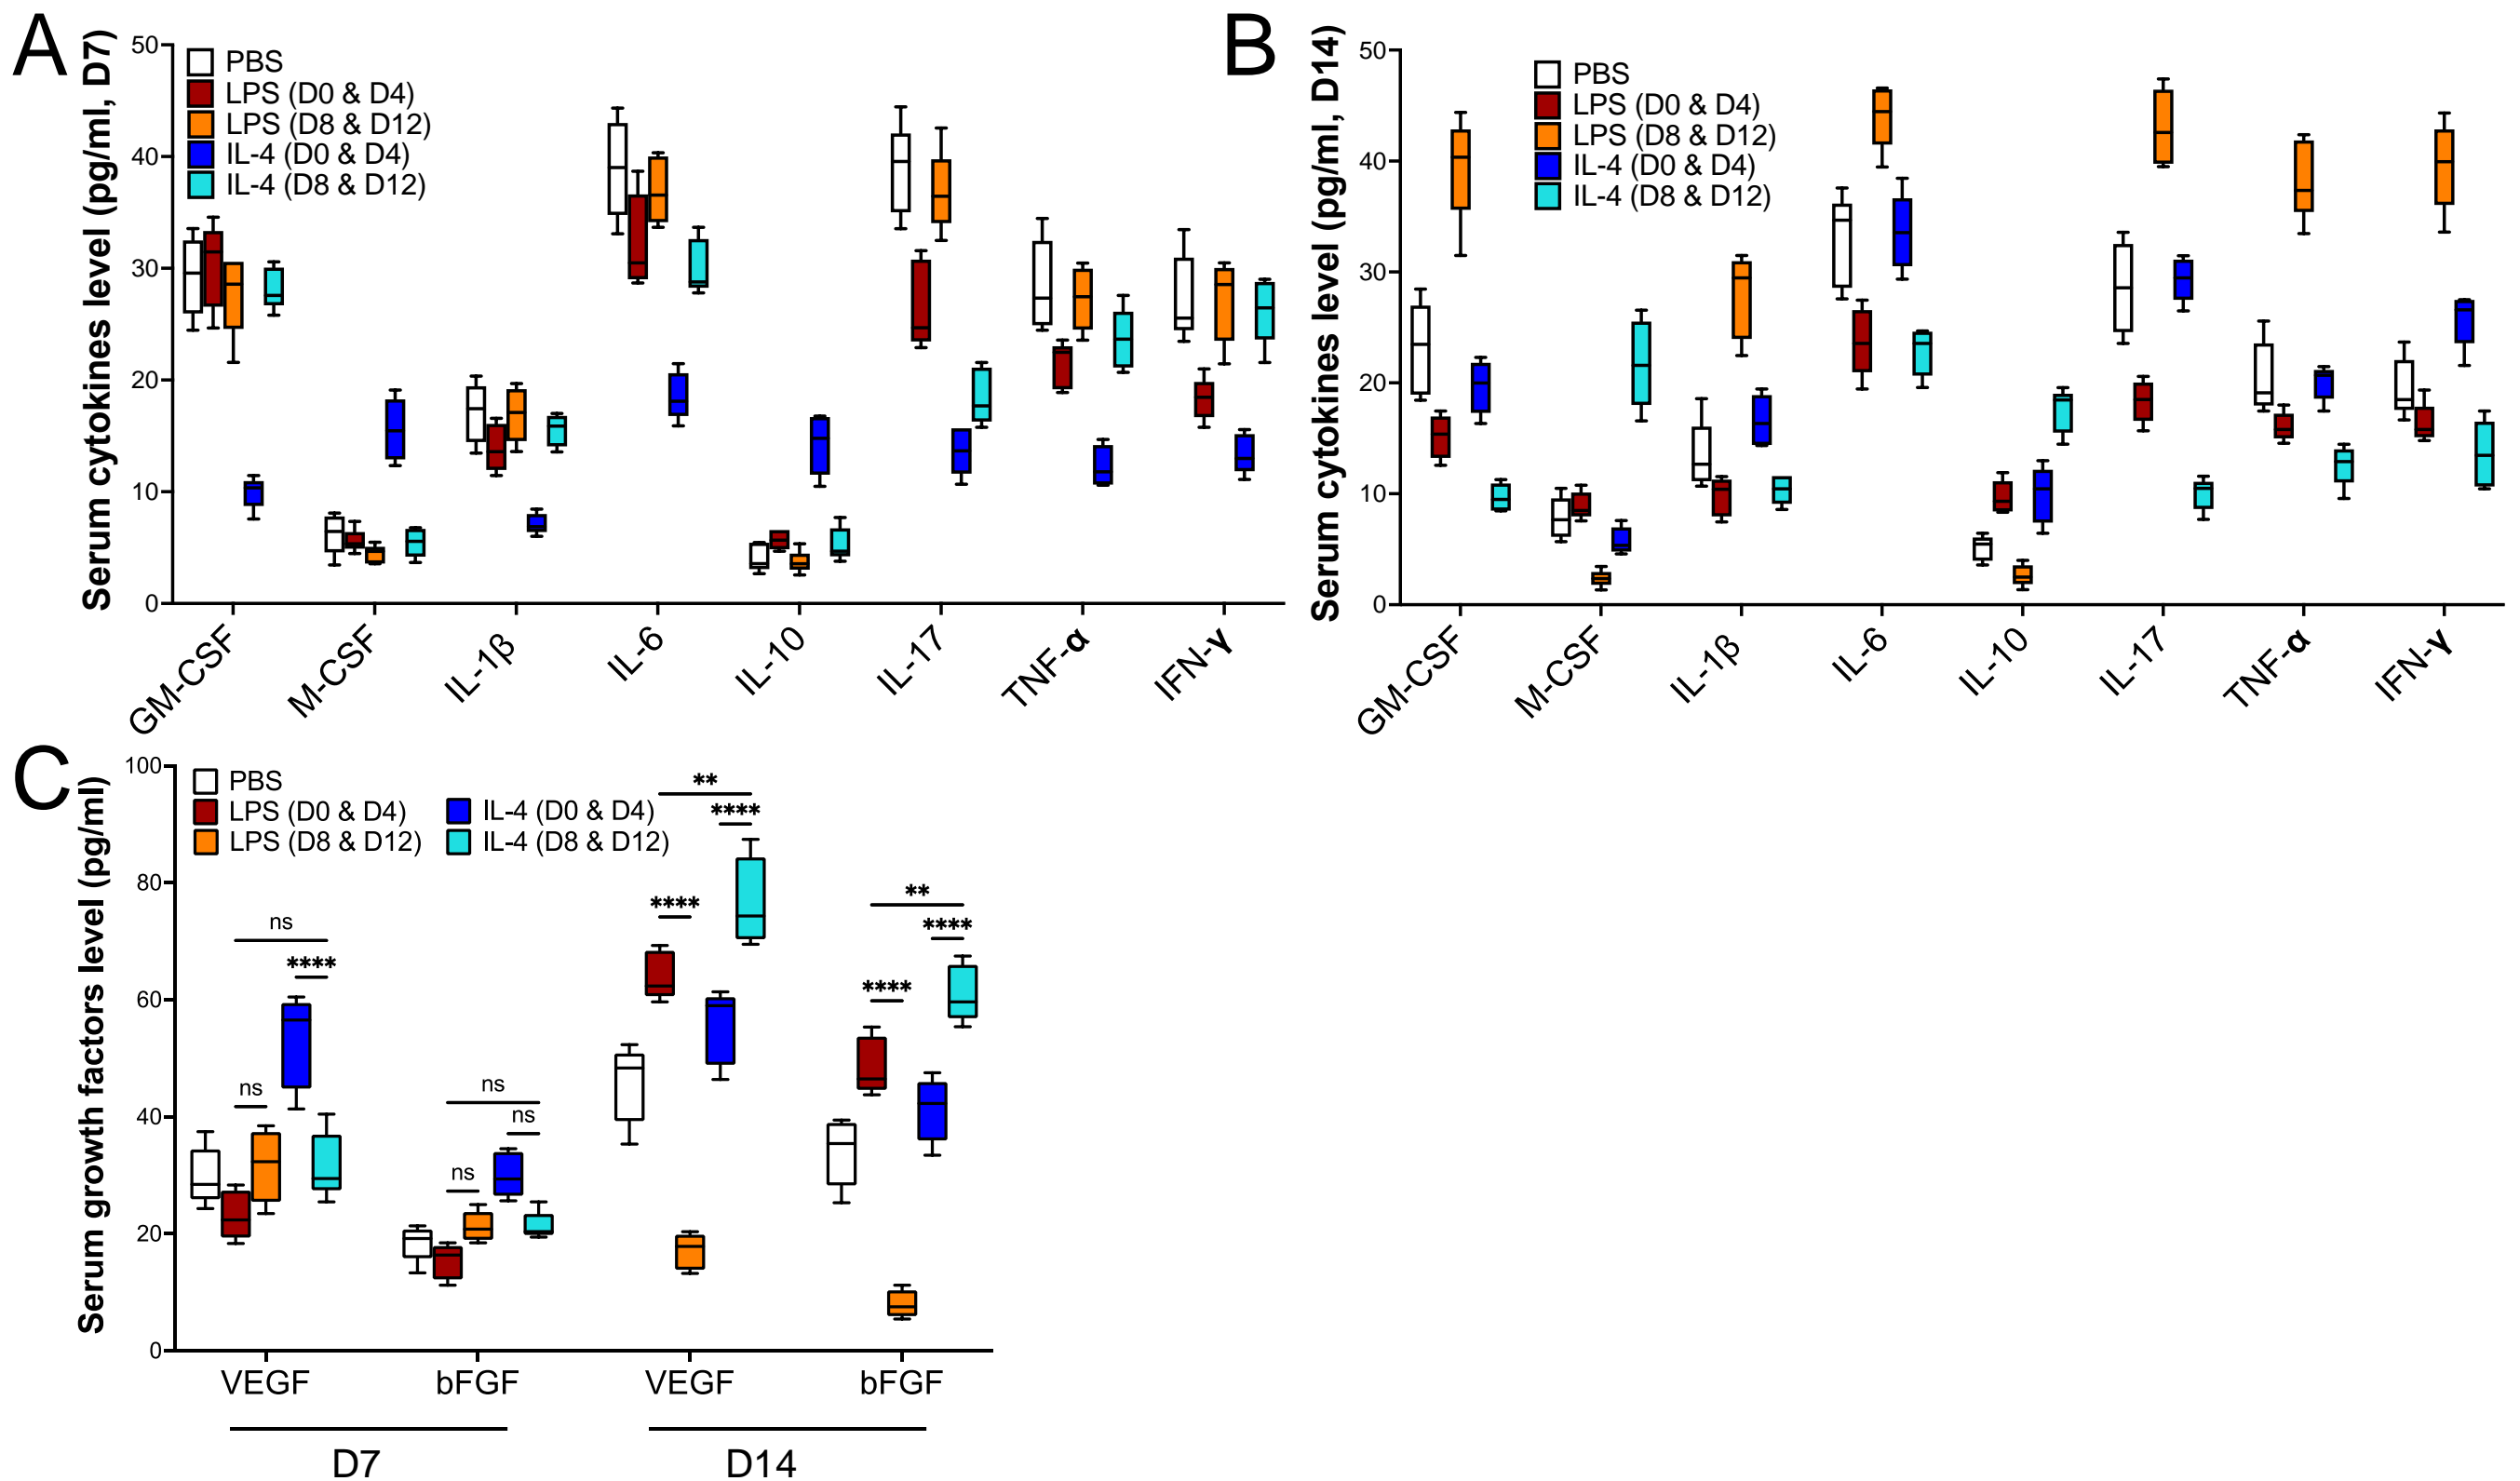

**sFigure 9.** Cytokines and growth factors in the serum from the mice were received PBS, LPS and IL-4 intramuscularly injection (n=5) at various time, were measured using ELISA. **A and B**, The cytokines in the serum on D7 (A) and D14 (B) post-surgery. **C**, Growth factors level in the serum. PBS, LPS D0 & D4 or IL-4 D0 & D4: the mice received PBS, LPS or IL-4 intramuscular injection on day 0 and day 4 post-surgery. LPS D8 & D12 or IL-4 D8 & D12: the mice received LPS or IL-4 intramuscular injection on day 8 and day 12 post-surgery. Data is analyzed using one-way ANOVA followed by Tukey multiple range test and expressed as mean  $\pm$  SD, \*\* $p < 0.01$ , \*\*\* $p < 0.001$  and \*\*\*\* $p < 0.0001$ . ns, non-significant.

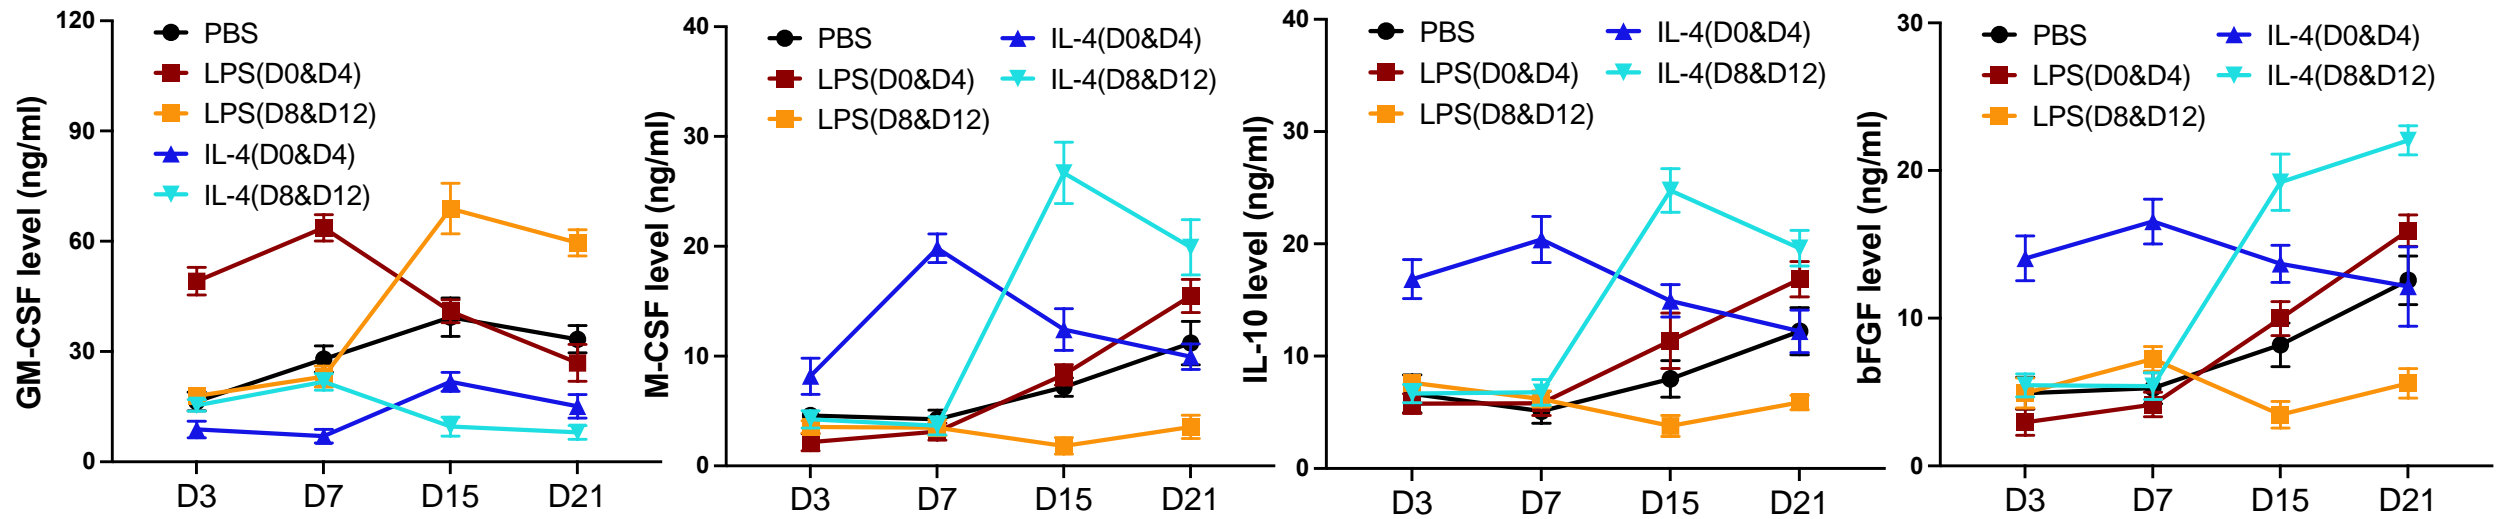

**sFigure 10.** Cytokines and growth factor secreted by macrophage collected from the hindlimb ischemic model mice that were received PBS, LPS and IL-4 intramuscularly injection (n=5) at various time, were measured using ELISA. . PBS, LPS D0 & D4 or IL-4 D0 & D4: the mice received PBS, LPS or IL-4 intramuscular injection on day 0 and day 4 post-surgery. LPS D8 & D12 or IL-4 D8 & D12: the mice received LPS or IL-4 intramuscular injection on day 8 and day 12 post-surgery. Data is analyzed using one-way ANOVA followed by Tukey multiple range test and expressed as mean  $\pm$  SD .

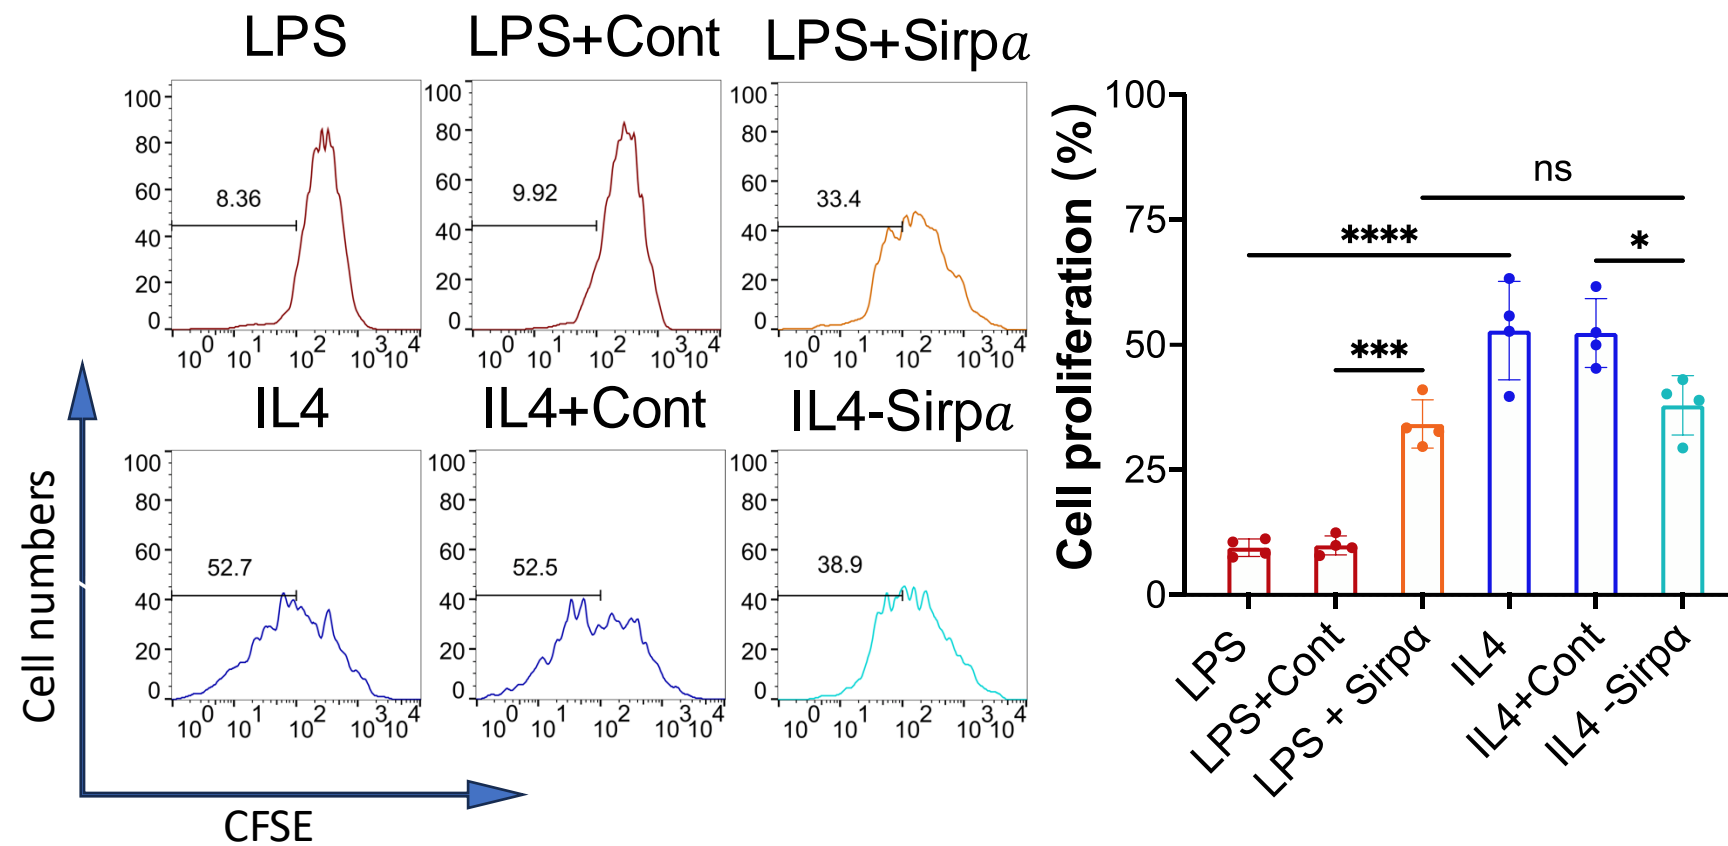

**sFigure 11.** CMVECs were treated with various conditioned medium (CdM) from macrophages. Cell proliferation assay of the CMVECs were performed. LPS: conditioned medium from LPS treated macrophage, IL4: conditioned medium from IL-4 treated macrophage, LPS+Cont or IL4+Cont: conditioned medium from LPS or IL-4 treated Lentivirus control transfected macrophage, LPS+Sirpa: conditioned medium from LPS treated Sirpa overexpressed macrophage, IL4- Sirpa: conditioned medium from IL-4 treated Sirpa knockdown macrophage. Data is analyzed using one-way ANOVA followed by Tukey multiple range test and expressed as mean  $\pm$  SD, \*\* $p < 0.01$ , \*\*\* $p < 0.001$  and \*\*\*\* $p < 0.0001$ . ns, non-significant. Total 5000 cells were analyzed.

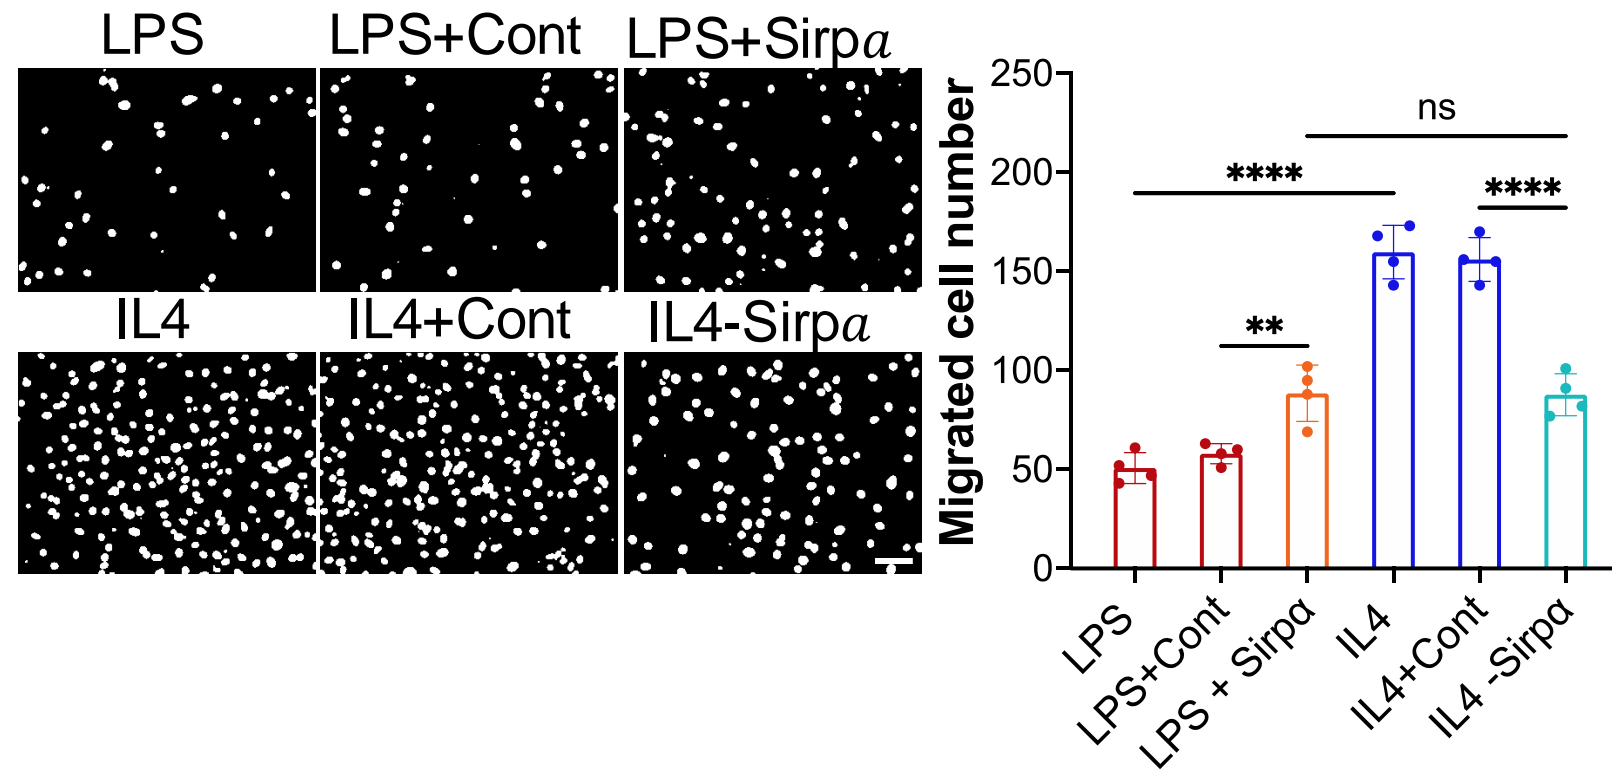

**sFigure 12.** Cell migration assay of the CMVECs that incubated with the various conditioned medium from the macrophages, were performed, scale bar: 100  $\mu$ m. Data is analyzed using one-way ANOVA followed by Tukey multiple range test and expressed as mean  $\pm$  SD , \*\* $p$ <0.01 and \*\*\*\* $p$ <0.0001. ns, non-significant.

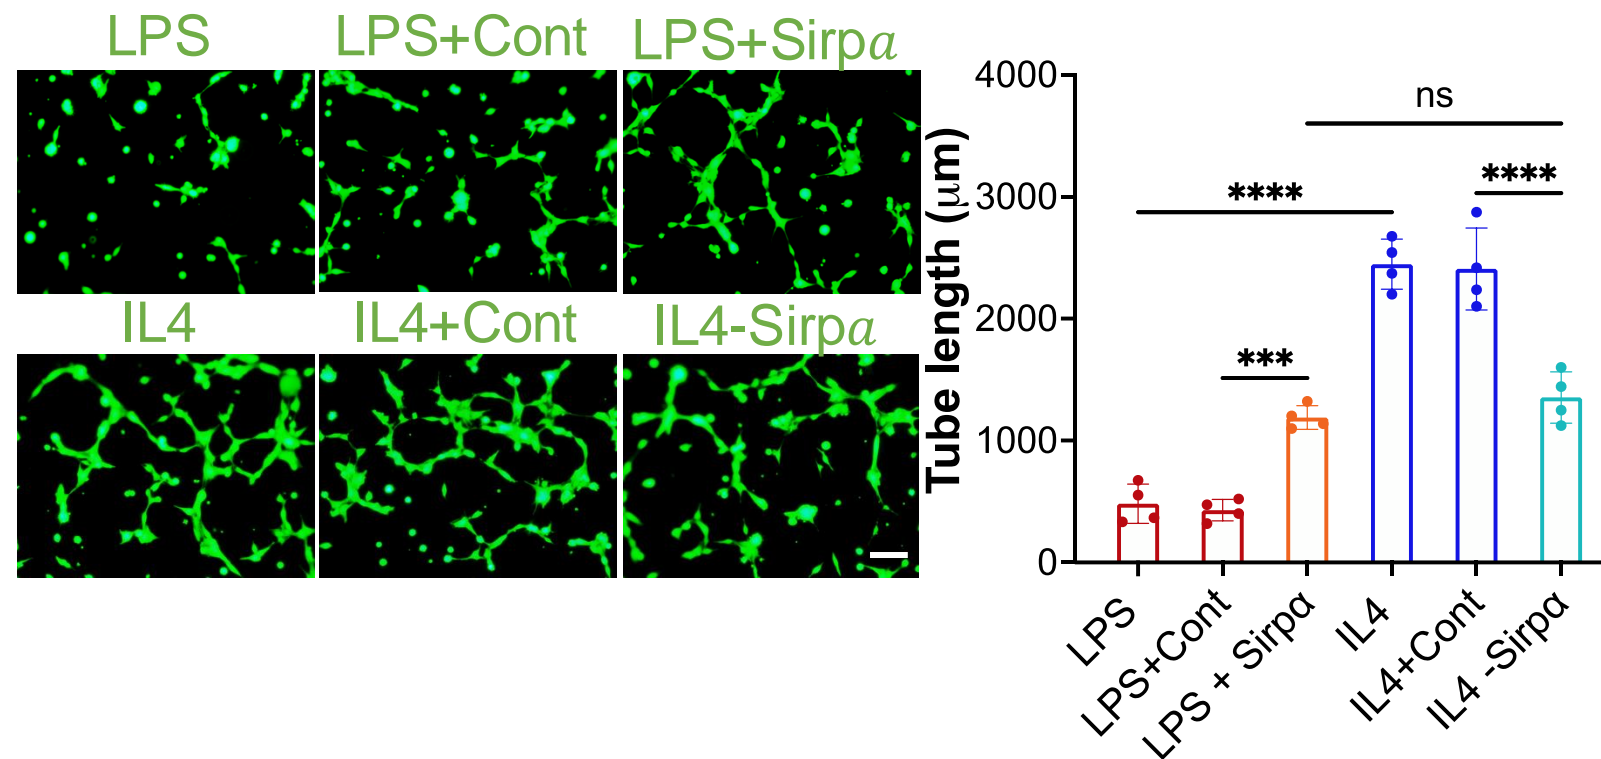

**sFigure 13.** Tube formation of the CMVECs that incubated with the various conditioned medium from the macrophages, were performed, scale bar: 50 µm. Data is analyzed using one-way ANOVA followed by Tukey multiple range test and expressed as mean  $\pm$  SD , \*\*\* $p$ <0.001 and \*\*\*\* $p$ <0.0001. ns, non-significant.

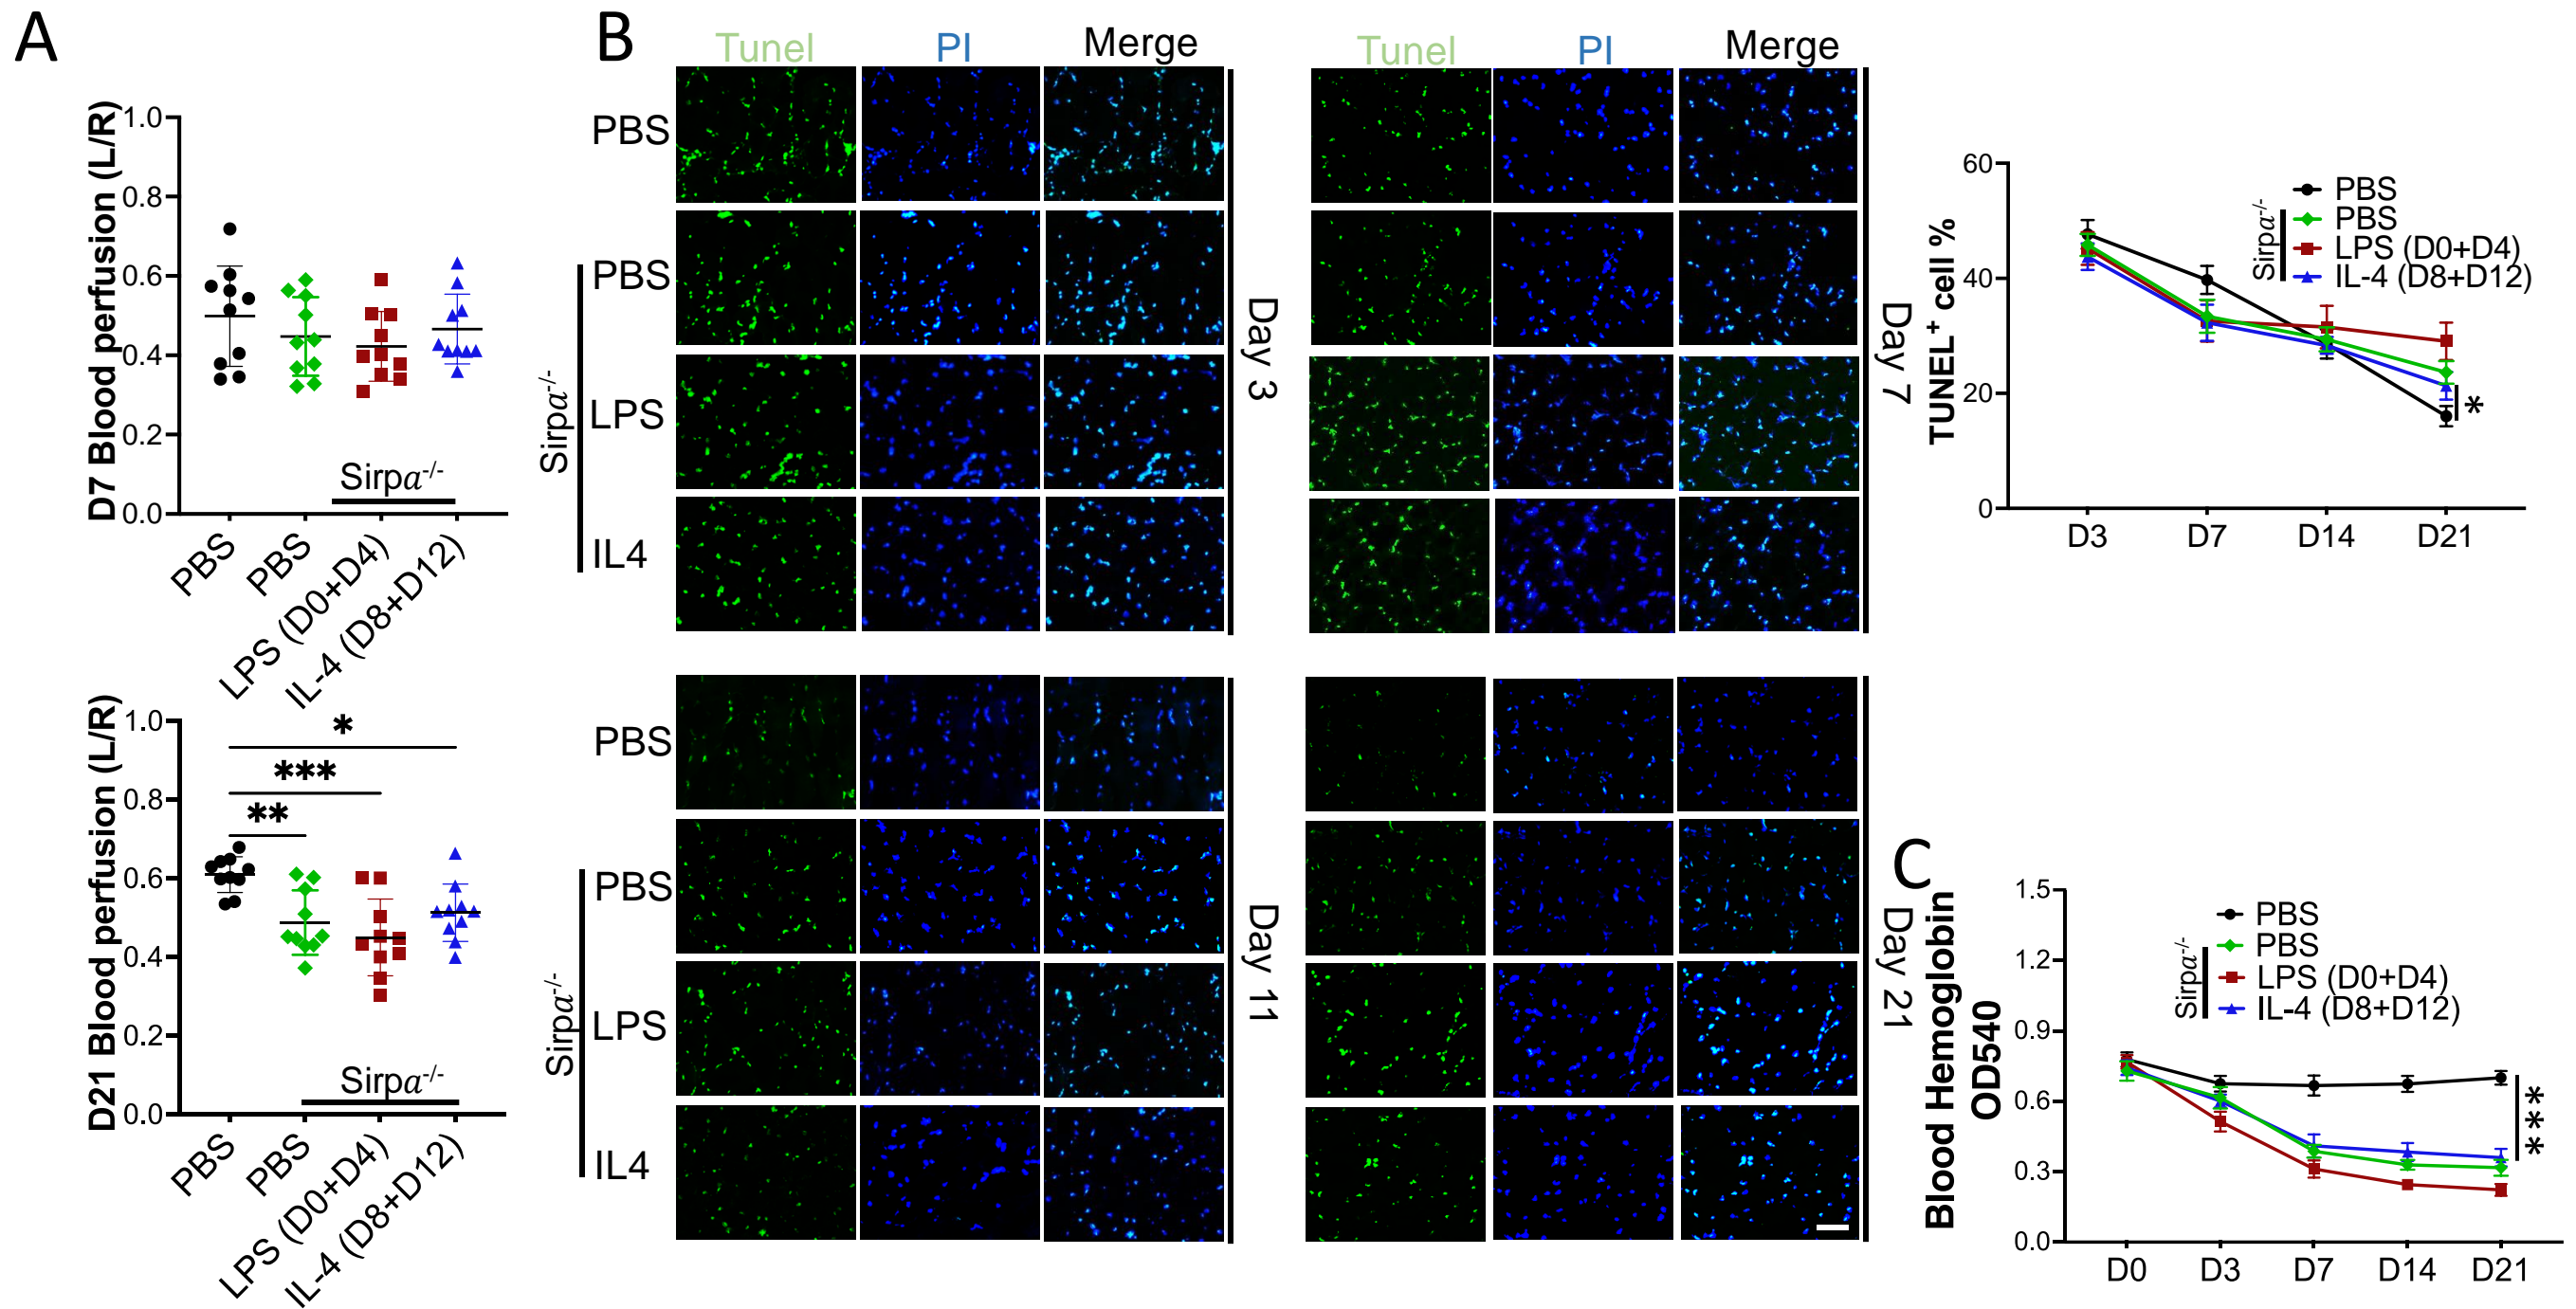

**sFigure 14.** *Sirpa* knockout (*Sirpa*<sup>-/-</sup>) attenuated LPS and IL-4 promoted angiogenesis in a mouse HLI model. After left artery ligation, the mice were received PBS (WT), PBS, LPS and IL-4 (*Sirpa* knockout) intramuscularly injection on indicated day (n=10). **A**, Quantitative analyses of the laser speckle images showing the left/right ratio of plantar blood perfusion (D7 and D21). **B**, The percentages of dead cells in gastrocnemius muscles on D3, D7, D14, and D21 post-surgery (scale bar: 100  $\mu$ m). **C**, Blood hemoglobin levels. Data is analyzed using one-way ANOVA followed by Tukey multiple range test and expressed as mean  $\pm$  SD, \* $p$ <0.05, \*\* $p$ <0.01 and \*\*\* $p$ <0.001.

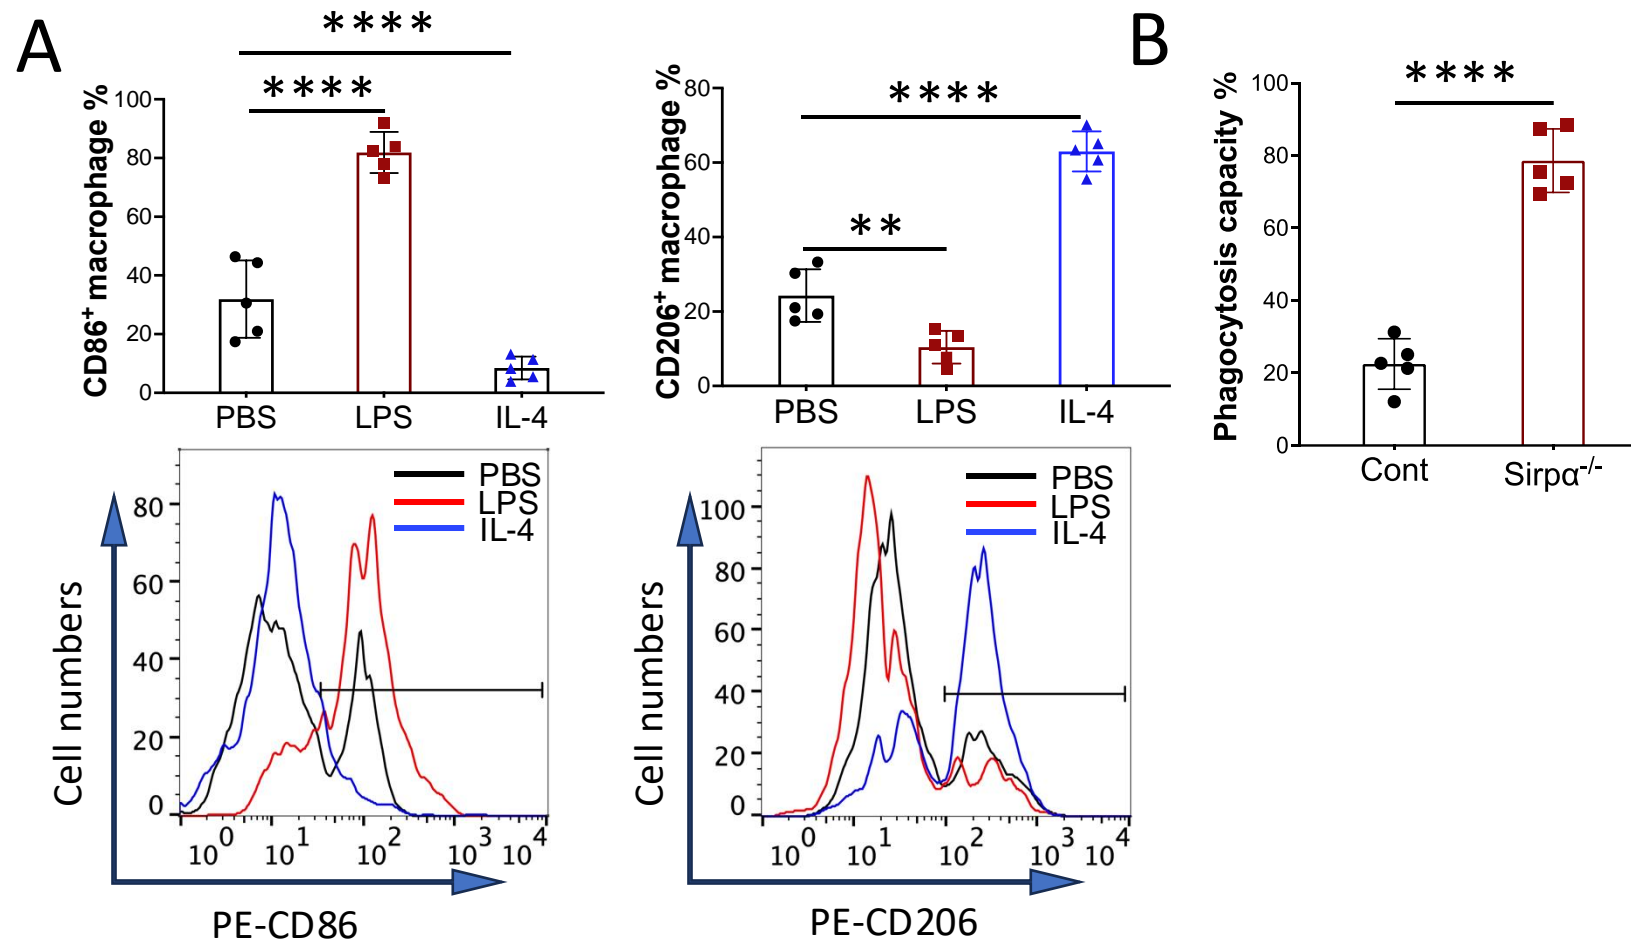

**sFigure 15.** *Sirpa* knockout does not affect macrophage polarization, but upregulating the phagocytosis of macrophage. The macrophages were collected from *Sirpa*<sup>-/-</sup> mice, and treated with PBS, LPS or IL-4 for 48h, respectively. **A**, The macrophage surface marker CD86 (pro-inflammatory polarization marker) and CD206 (anti-inflammatory polarization marker) were tested by flow cytometry. Total 5000 cells were gated and analyzed. **B**, The phagocytosis of pHrodo Red-labeled apoptotic MCMVEC cells by the macrophages collected from WT (Cont) or *Sirp*<sup>-/-</sup> mice (*Sirp*<sup>-/-</sup>). Data is analyzed using one-way ANOVA followed by Tukey multiple range test and expressed as mean  $\pm$  SD, \*\* $p < 0.01$  and \*\*\*\* $p < 0.0001$ .

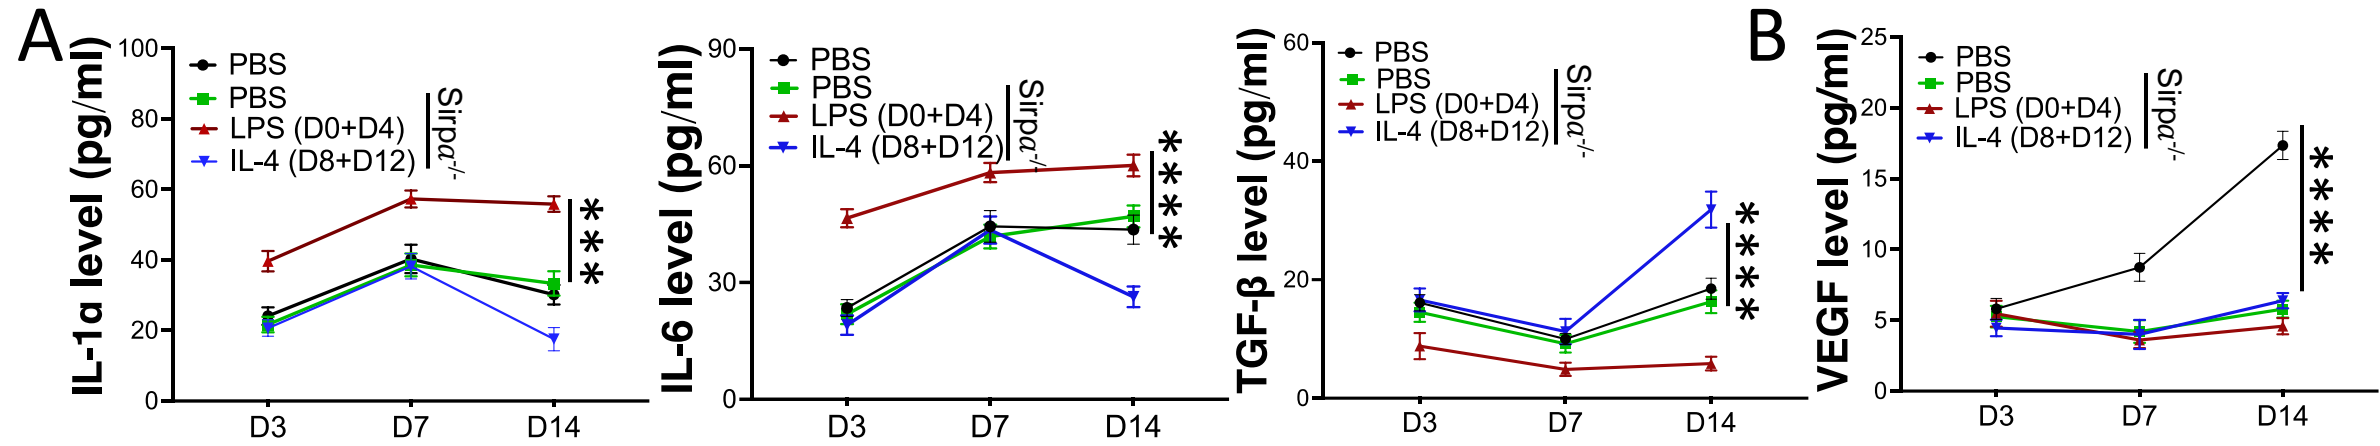

**sFigure 16.** Cytokines and growth factors in the serum from the hindlimb ischemia model of *Sirpa*<sup>-/-</sup> mice received PBS, LPS and IL-4 intramuscularly injection (n=5) on indicated time, were measured using ELISA, WT mice received PBS were used as a control. **A**, The cytokines in the serum. **B**, Growth factor VEGF level. Data is analyzed using one-way ANOVA followed by Tukey multiple range test and expressed as mean  $\pm$  SD, \*\*\* $p$ <0.001 and \*\*\*\* $p$ <0.0001.



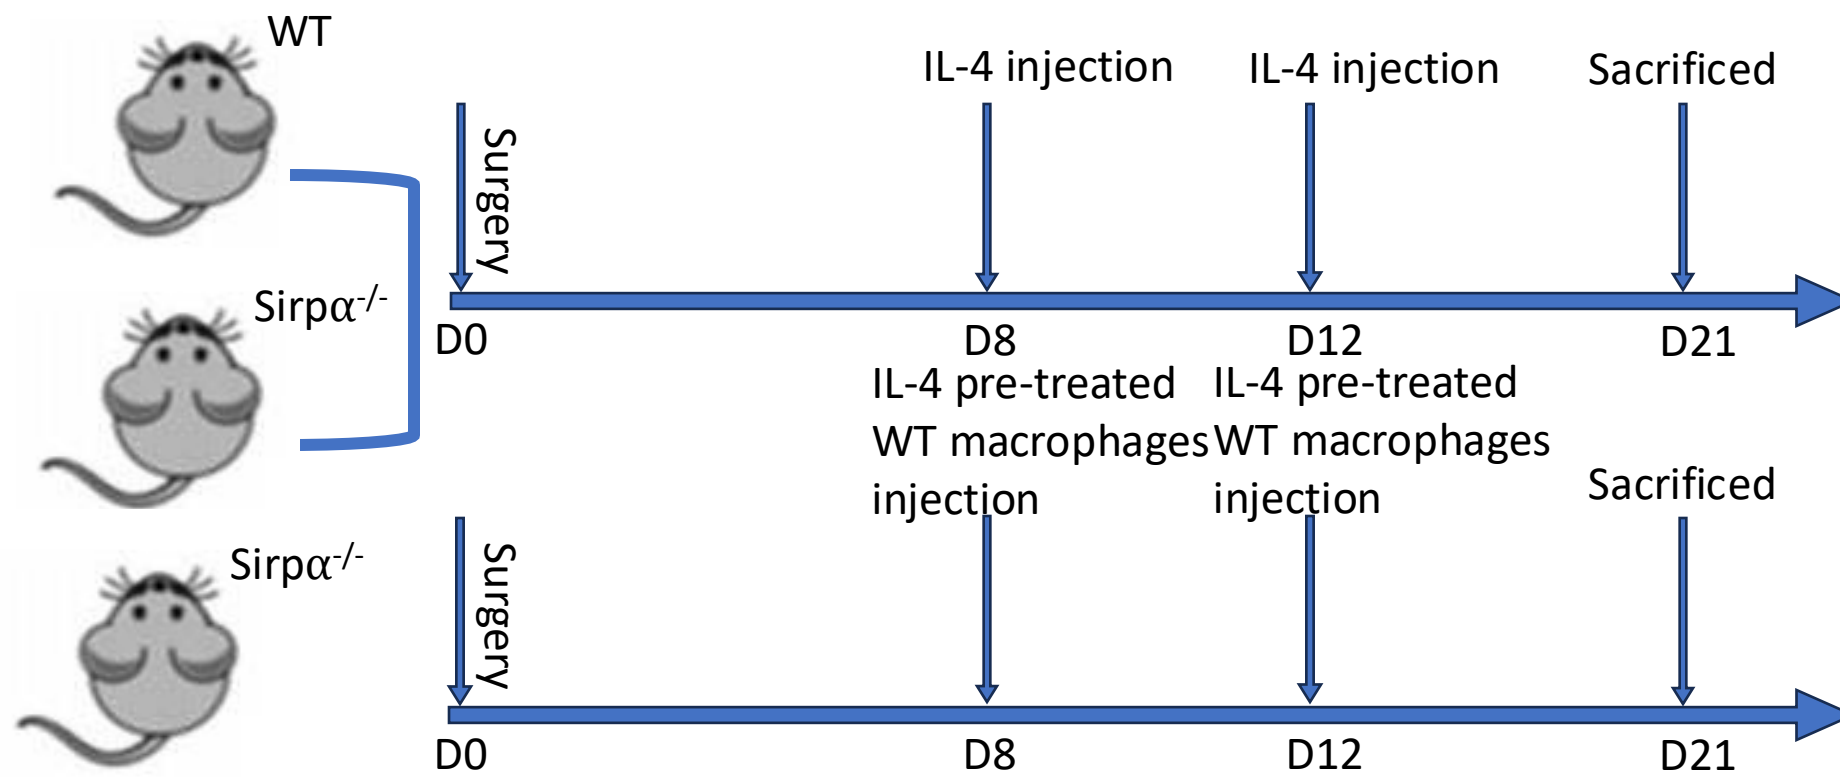

**sFigure 17.** A scheme for the experimental setup of Figure 4C and 4D.

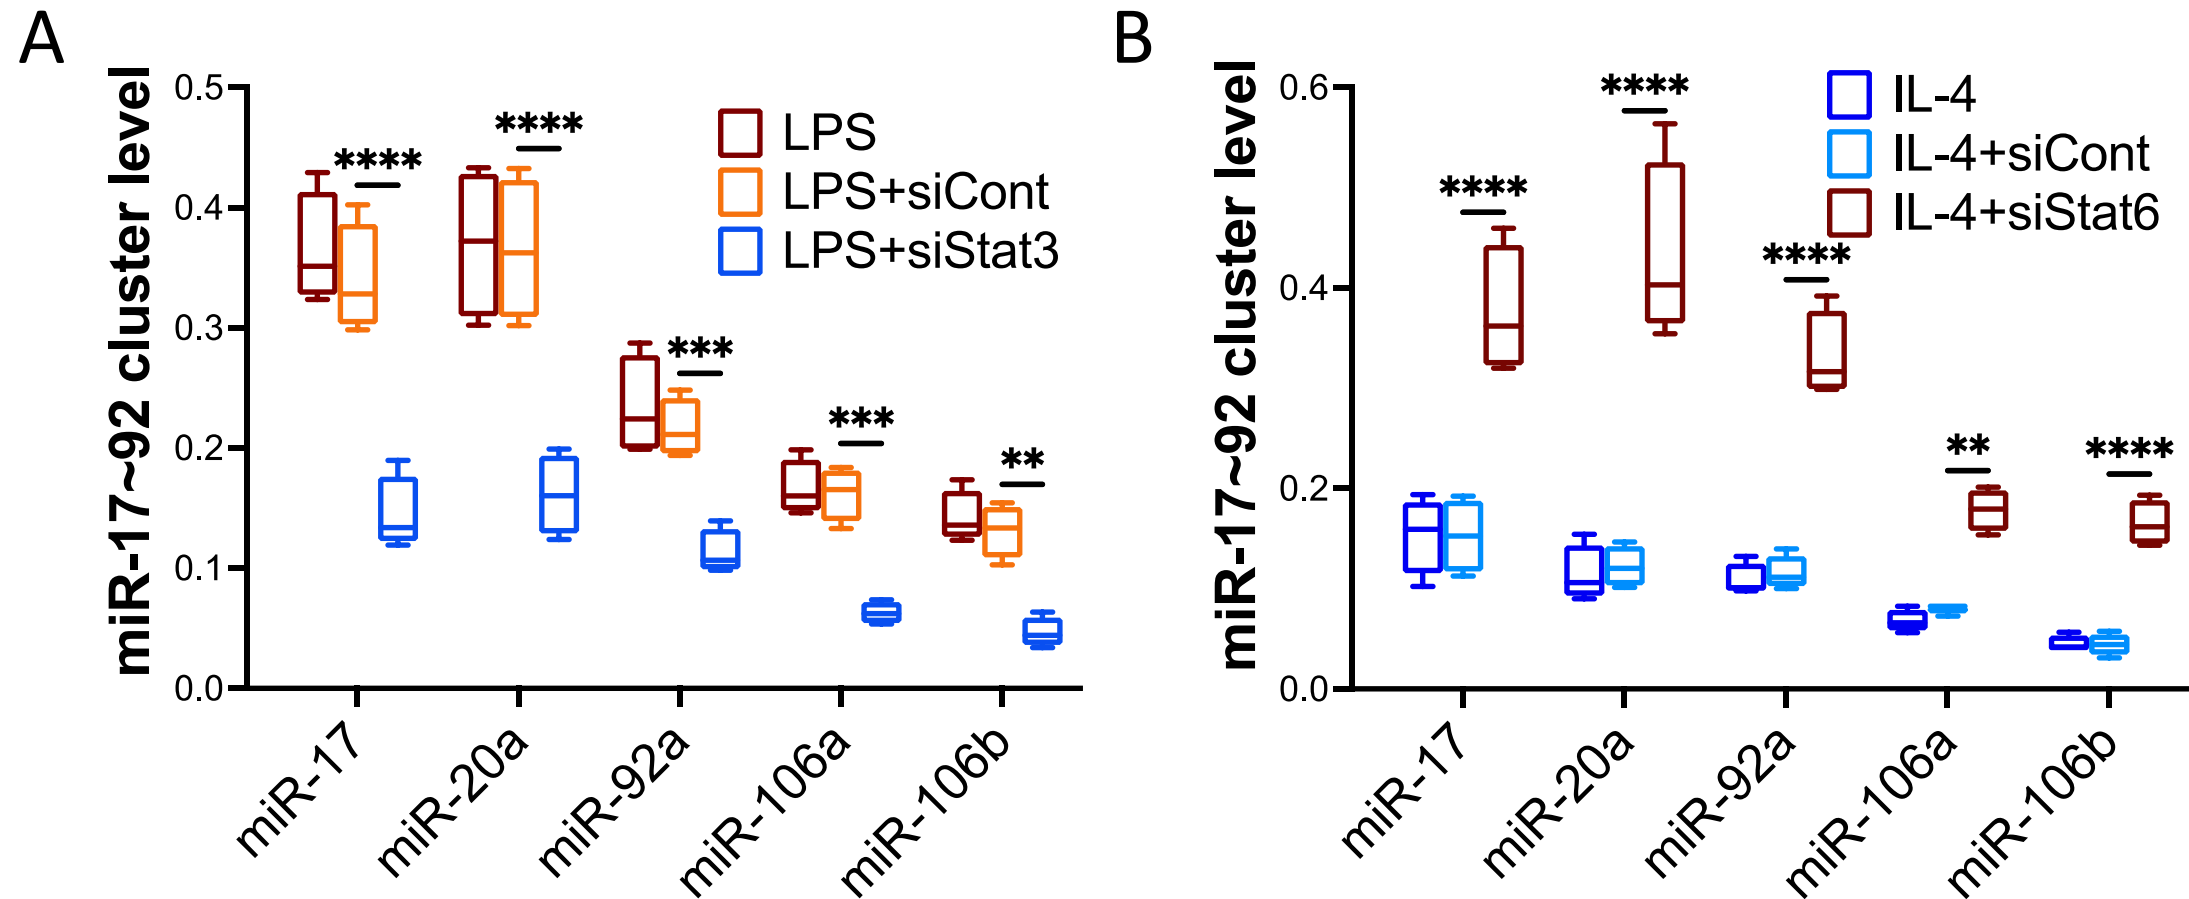

**sFigure 18.** Macrophages isolated from adductor muscles of WT mice were pre-treated with LPS or IL-4. Lentivirus was used to knock down Stat3 (siStat3) or Stat6 (siStat6) in the macrophage, lentivirus control (siCont) was used as a control. **A and B**, The levels of miR17~92 cluster in the macrophages that received LPS (A) or IL-4 (B), were determined by RT-qPCR (n=4). LPS: the macrophages were treated with LPS, IL-4: the macrophages were treated with IL-4, LPS+siCont or IL-4+siCont: lentivirus control transfected macrophages were treated with LPS or IL-4, LPS+siStat3: Stat3 downregulated macrophages were treated with LPS, IL-4+siStat6: Stat6 downregulated macrophages were treated with IL-4. Data is analyzed using one-way ANOVA followed by Tukey multiple range test and expressed as mean  $\pm$  SD, \*\* $p$ <0.01, \*\*\* $p$ <0.001 and \*\*\*\* $p$ <0.0001.

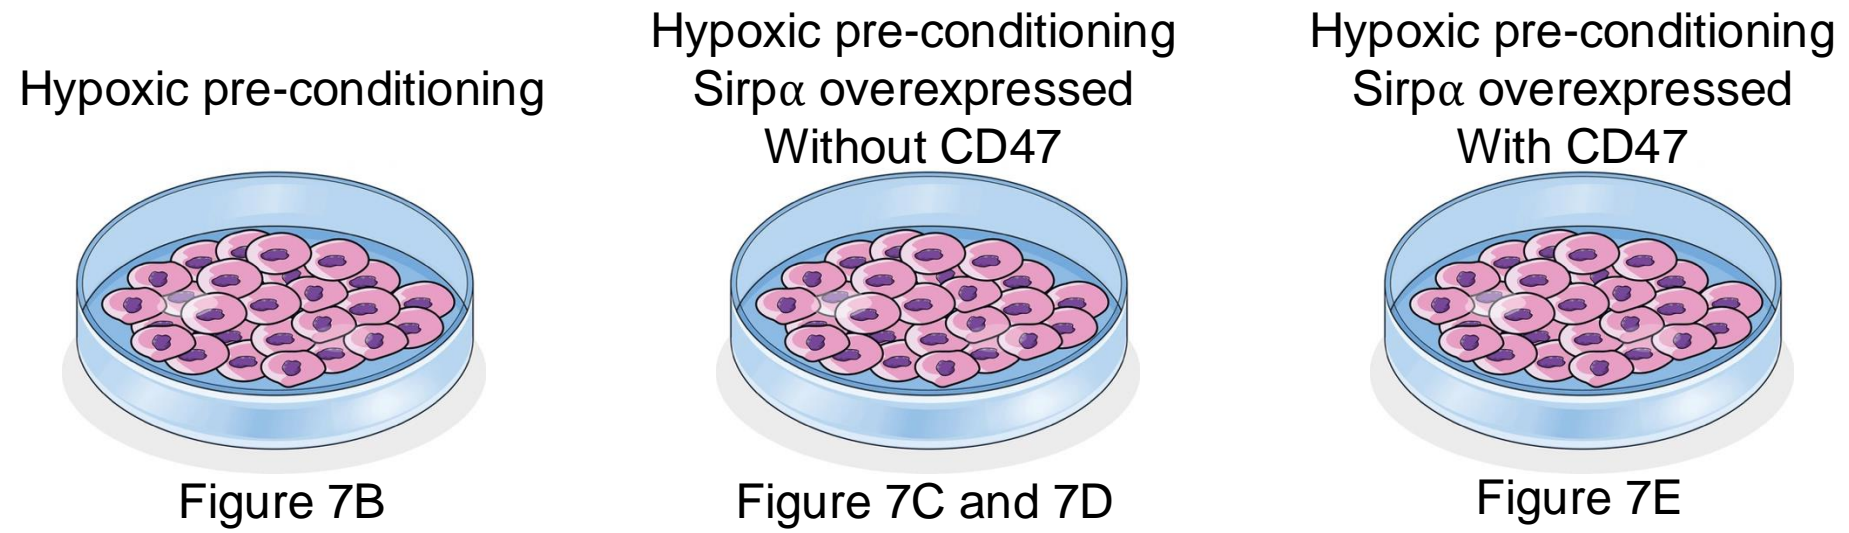

**sFigure 19.** A scheme for the experimental setup of Figure 7

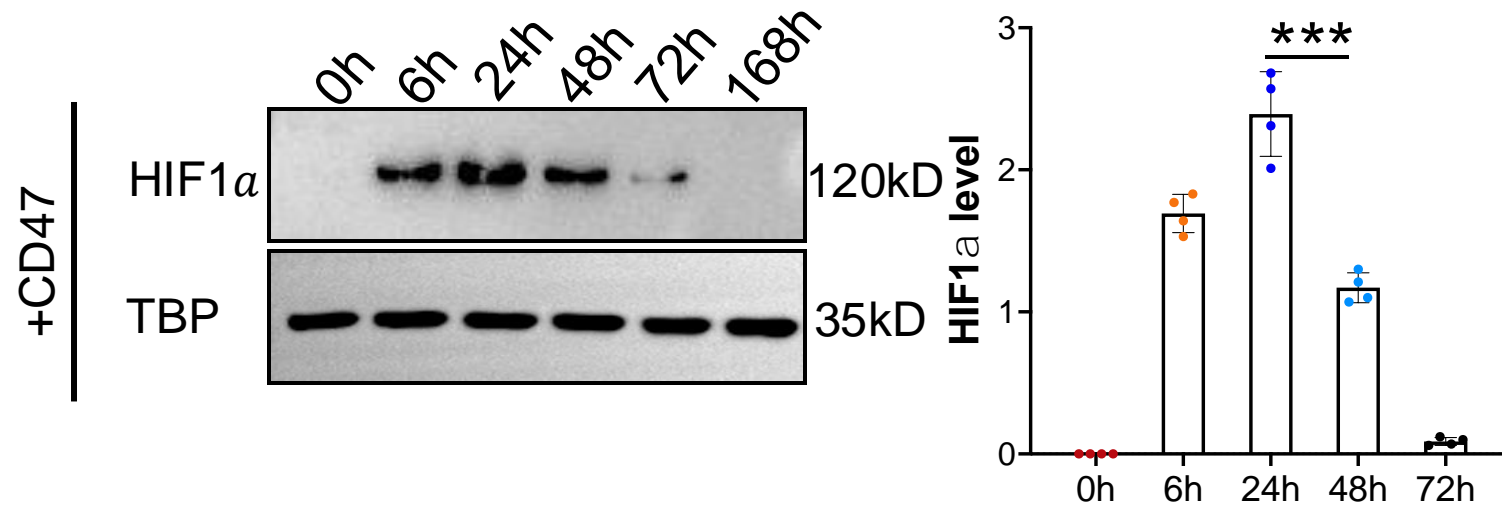

**sFigure 20.** The macrophages collected from adductor muscles of WT mice were pre-treated with 30ng/ml IL-4 for 48h and then incubated under hypoxic conditions for 0 to 168h with the presence of CD47. The level of HIF1 $\alpha$  in nucleus was determined by immunoblotting. Data is analyzed using one-way ANOVA followed by Tukey multiple range test and expressed as mean  $\pm$  SD. \*\*\*p<0.001, ns, non-significant.

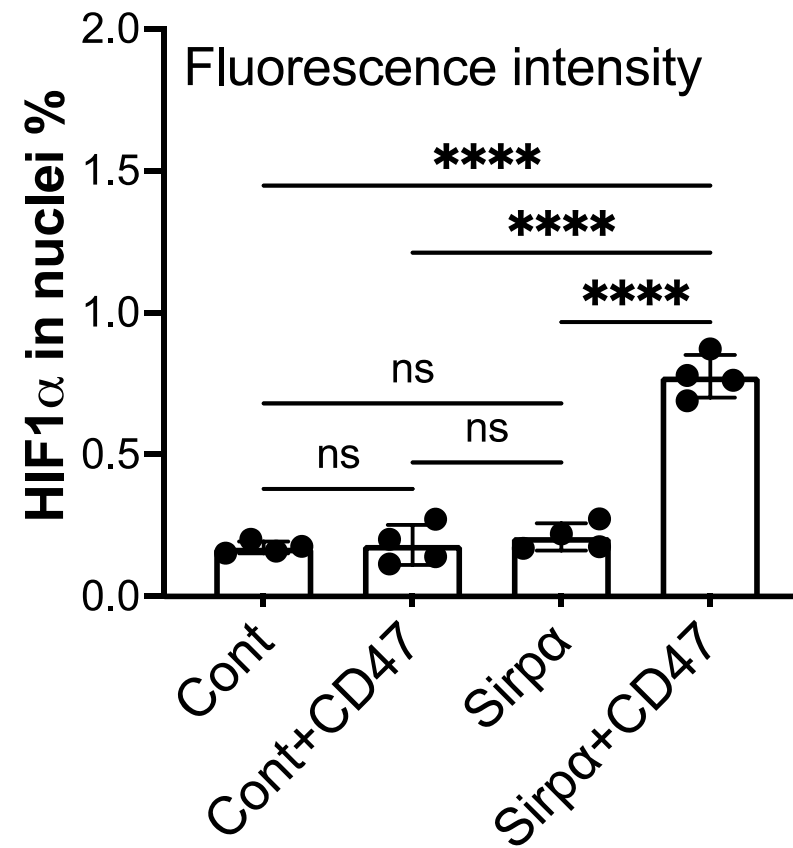

**sFigure 21.** Macrophages were incubated in hypoxic condition. The fluorescence intensity of HIF1 $\alpha$  in the Sirp $\alpha$  overexpressed macrophages nuclei with or without CD47, Lentiviruses control-treated macrophages were used as a control (n=4). Data is analyzed using one-way ANOVA followed by Tukey multiple range test and expressed as mean  $\pm$  SD , \*\*\*\* $p$ <0.0001. ns, non-significant.

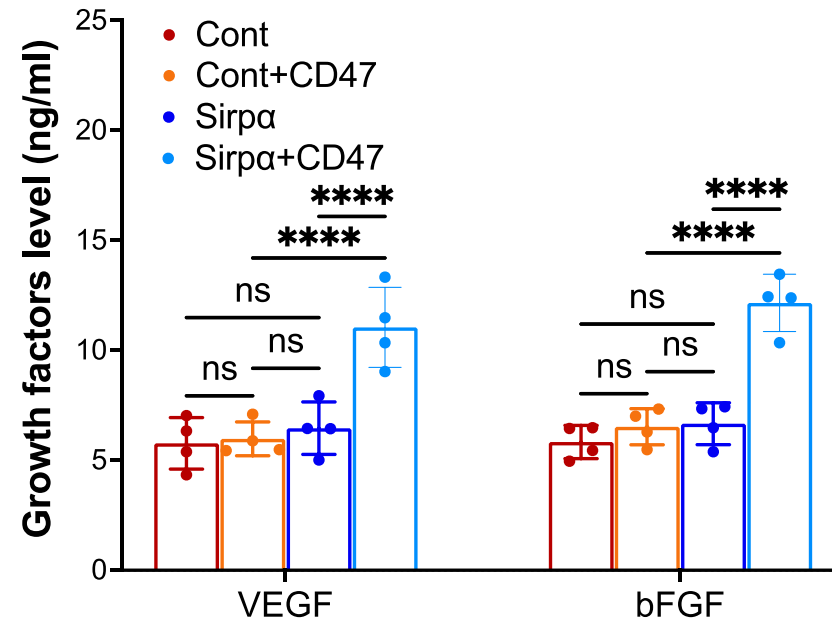

**sFigure 22.** Macrophage were collected from the adductor muscles of WT mice. The level of growth factors in the Sirp $\alpha$  overexpressed macrophages with or without the presence of CD47 under hypoxic condition. Cont: Lentiviruses control-treated macrophage without the presence of CD47, Cont CD47: Lentiviruses control-treated macrophage with the presence of CD47, Sirp $\alpha$ : Sirp $\alpha$  overexpressed macrophage without the presence of CD47, Sirp $\alpha$  CD47: Sirp $\alpha$  overexpressed macrophage with the presence of CD47. Data is analyzed using one-way ANOVA followed by Tukey multiple range test and expressed as mean  $\pm$  SD , \*\*\*\* $p$ <0.0001. ns, non-significant.

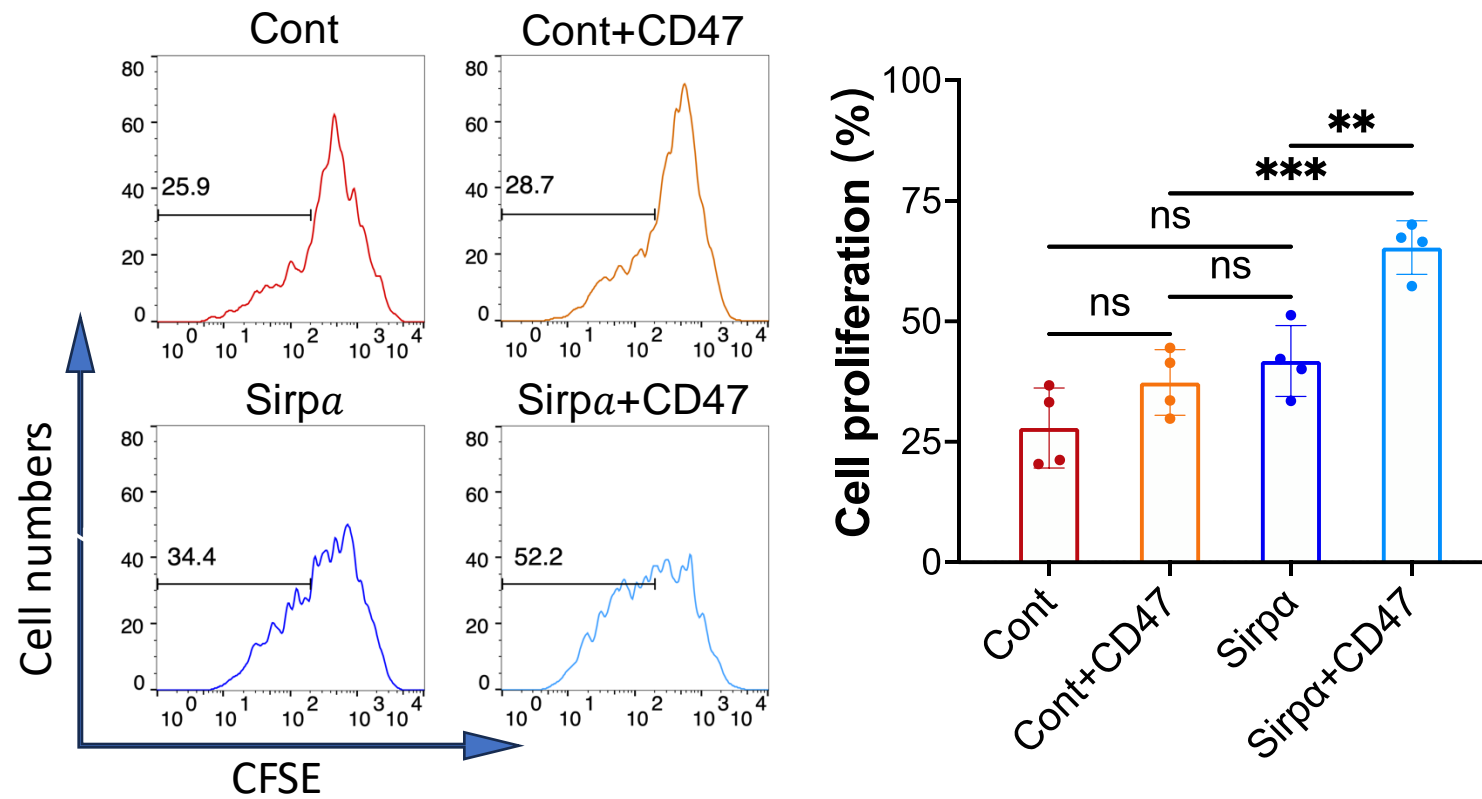

**sFigure 23.** CMVECs were treated with various conditioned medium (CdM) from the macrophages for 4 days. Cell proliferation assay of the CMVECs were performed. Data is analyzed using one-way ANOVA followed by Tukey multiple range test and expressed as mean  $\pm$  SD , \*\* $p$ <0.01 and \*\*\* $p$ <0.001. ns, non-significant. Total 5000 cells were analyzed.

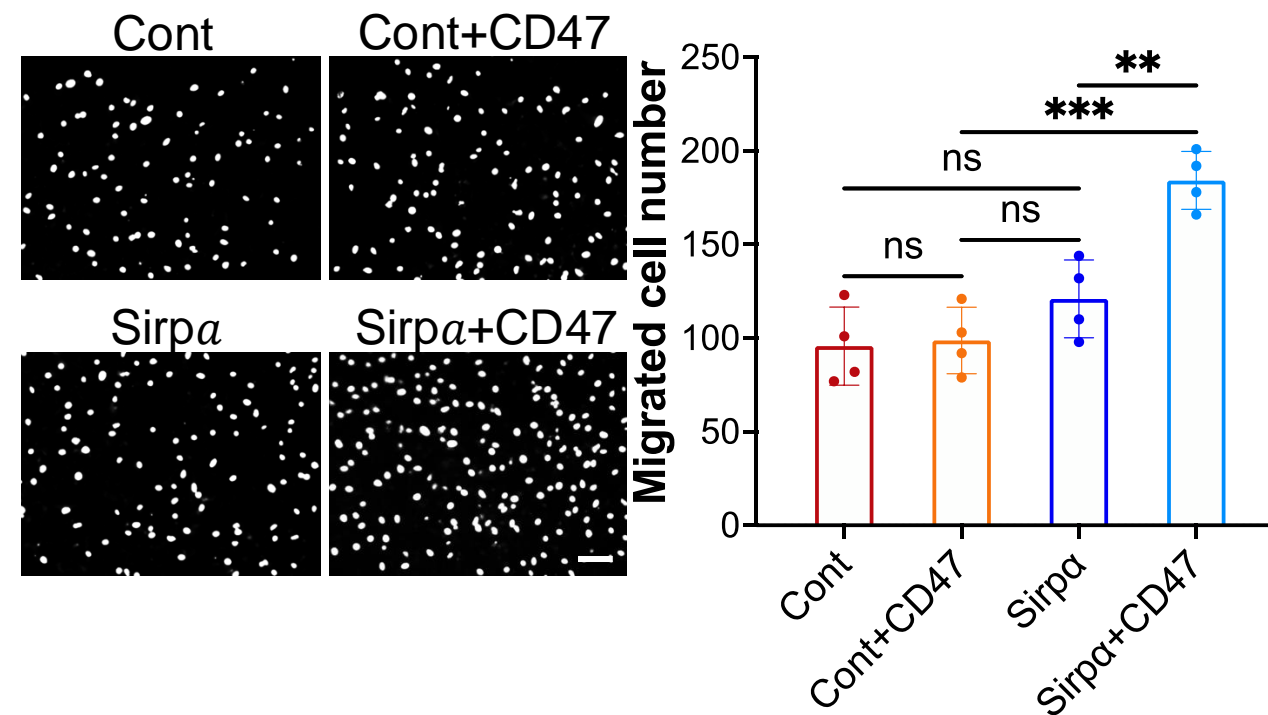

**sFigure 24.** CMVECs were treated with various conditioned medium (CdM) from macrophages. Cell migration assay of the CMVECs were performed, scale bar: 100  $\mu$ m. Data is analyzed using one-way ANOVA followed by Tukey multiple range test and expressed as mean  $\pm$  SD , \*\* $p$ <0.01 and \*\*\* $p$ <0.001. ns, non-significant.



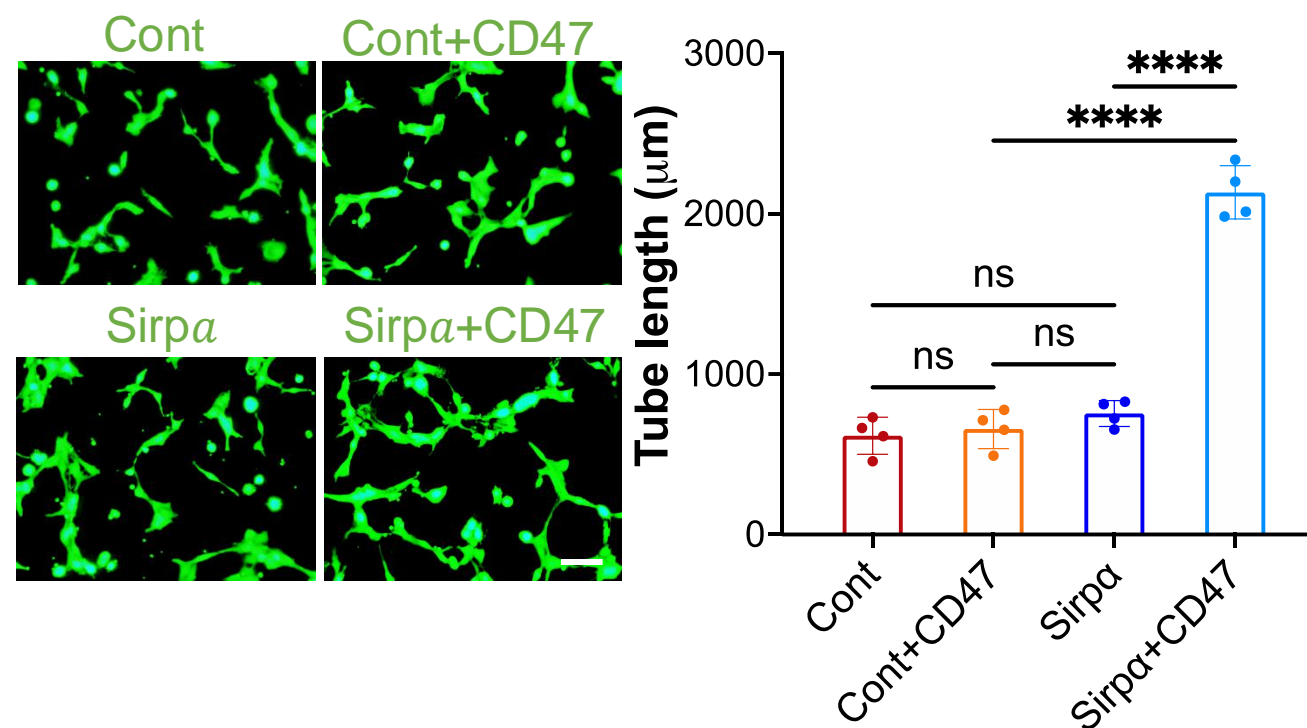

**sFigure 25.** CMVECs were treated with various conditioned medium (CdM) from macrophages. Tube formation assay of the CMVECs were performed, scale bar: 50 μm. Data is analyzed using one-way ANOVA followed by Tukey multiple range test and expressed as mean ± SD , \*\*\*\* $p < 0.0001$ . ns, non-significant.

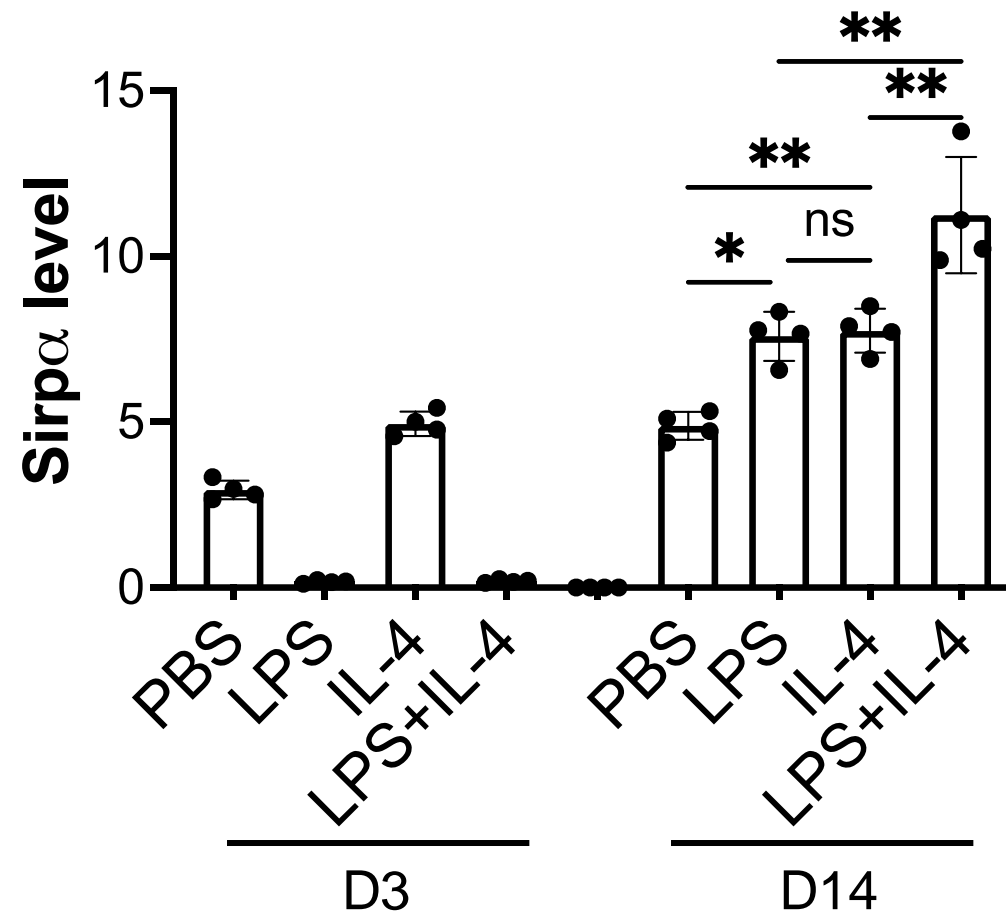

**sFigure 26.** Quantitative analysis of Sirp $\alpha$  level in the infarcted heart. Data is analyzed using one-way ANOVA followed by Tukey multiple range test and expressed as mean  $\pm$  SD , \* $p$ <0.05 and \*\* $p$ <0.01 . ns, non-significant.

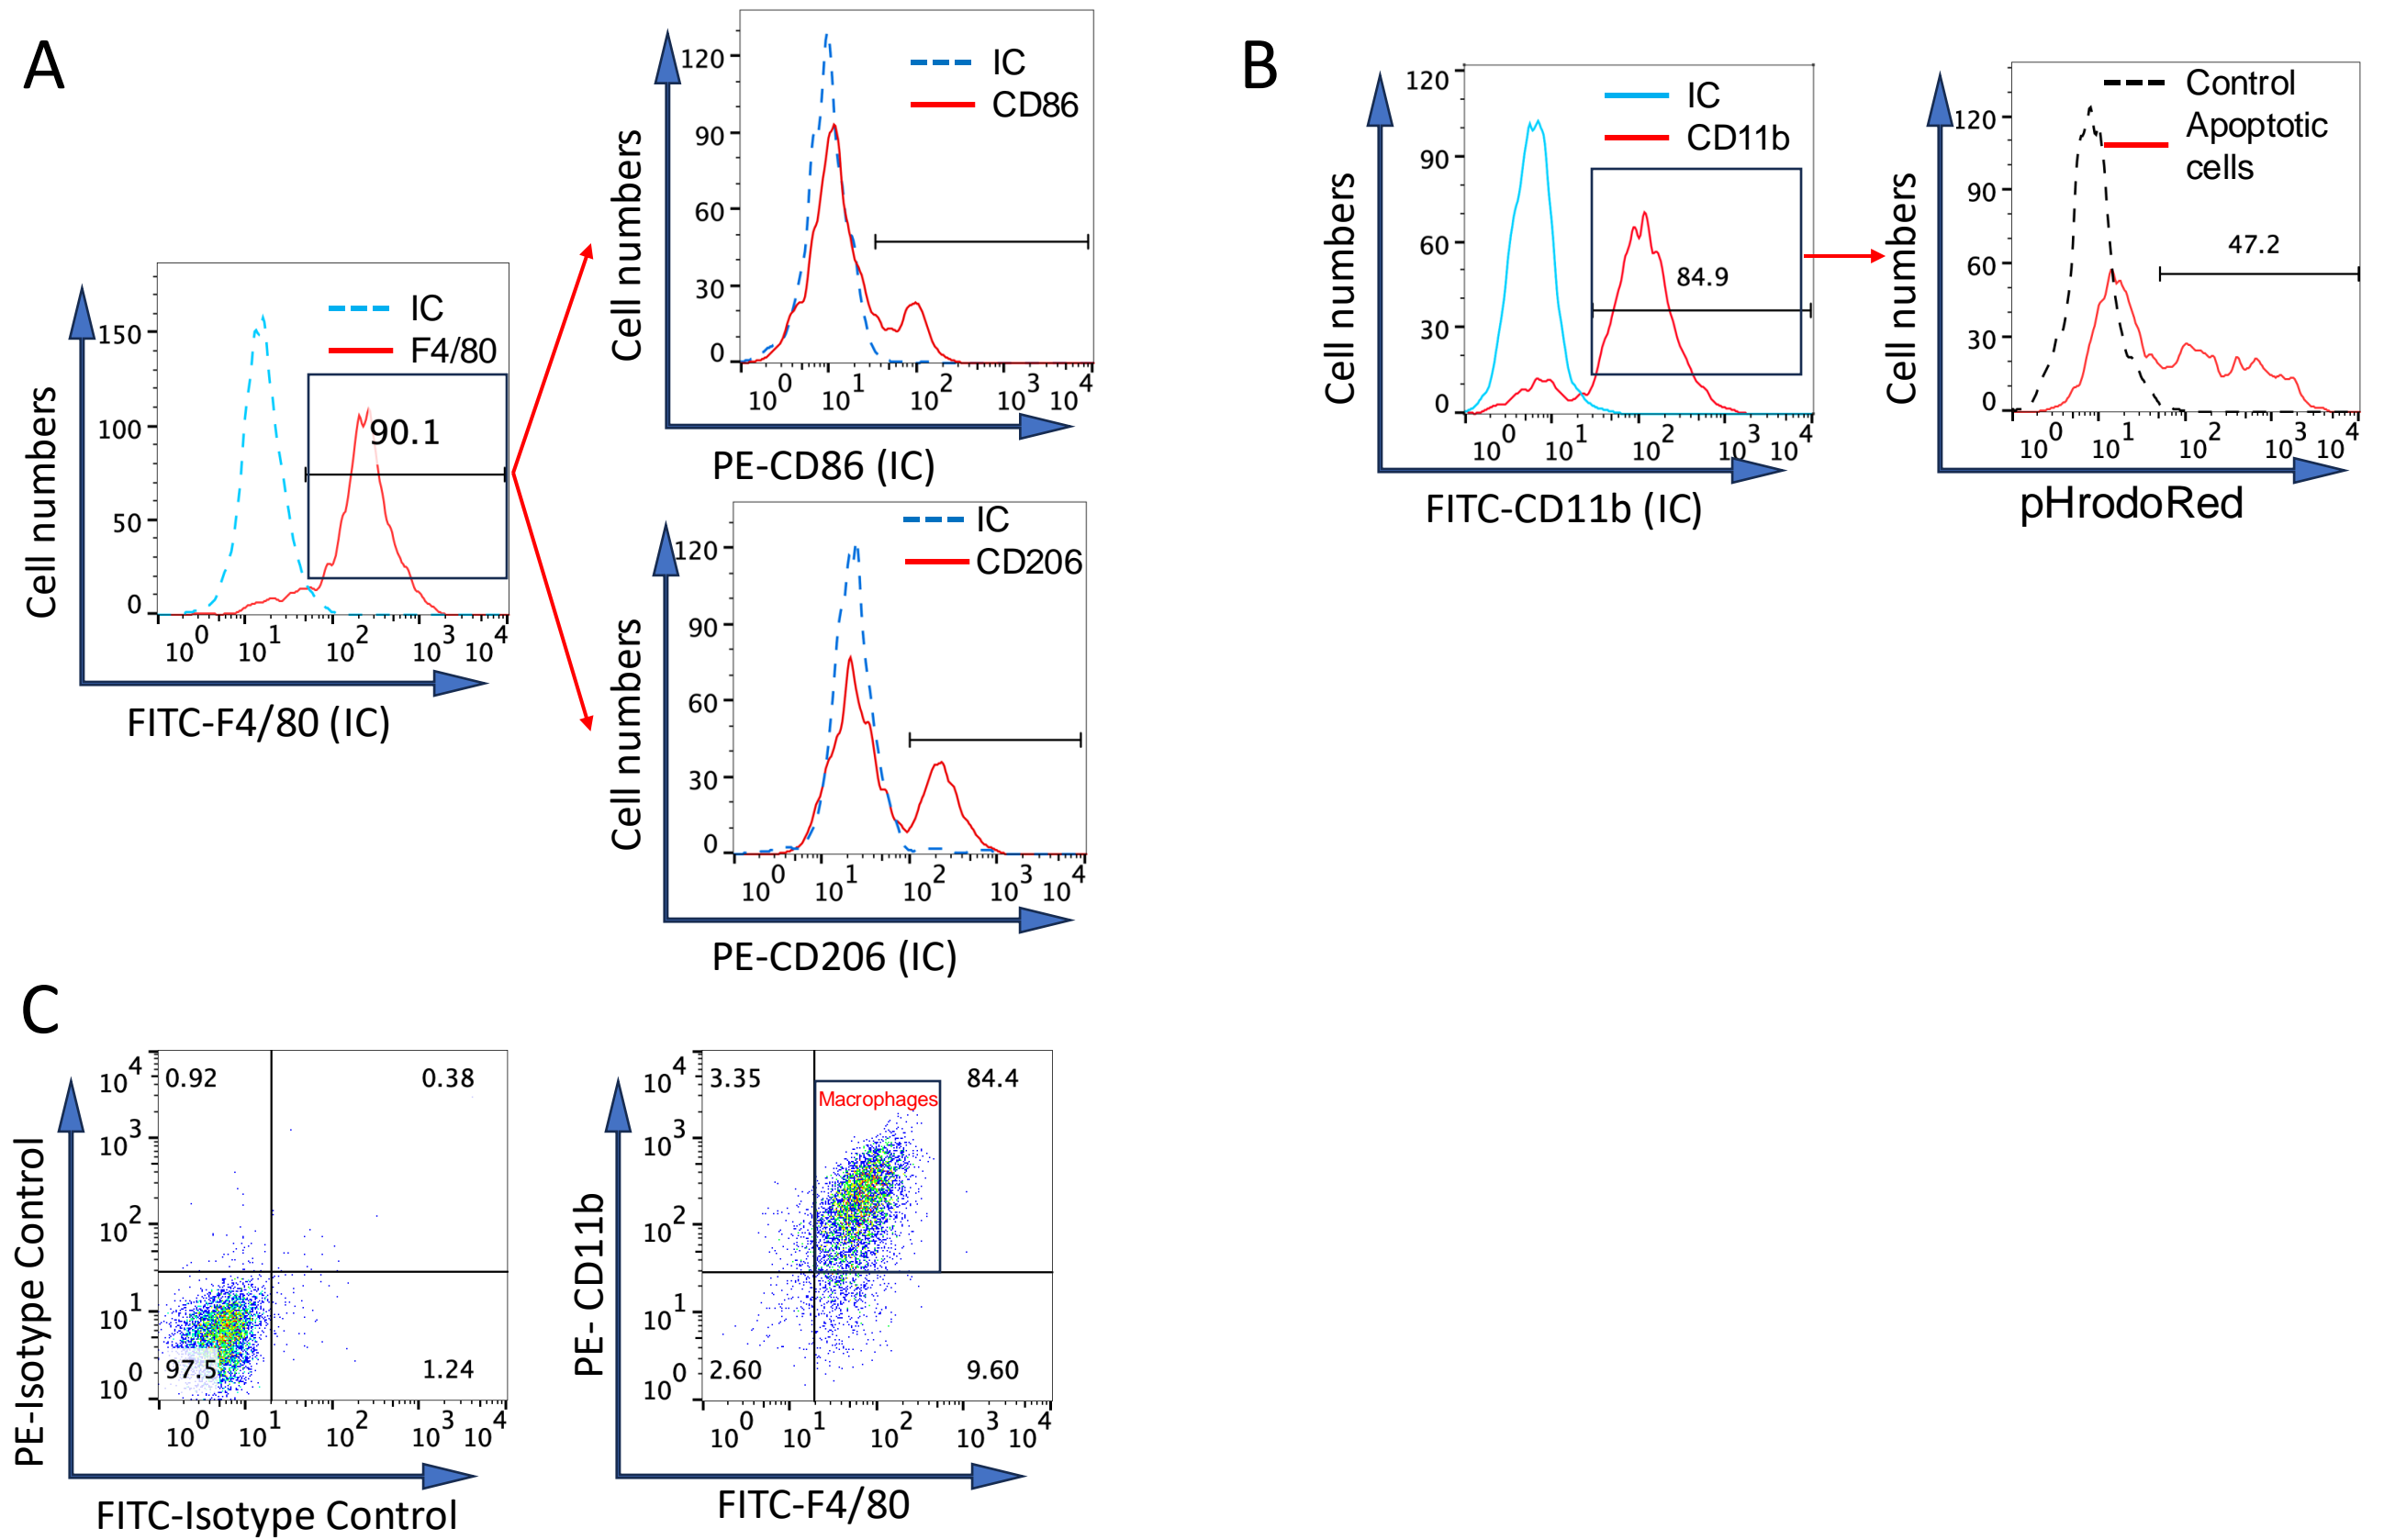

**sFigure 27. A and B, Gating strategies of flow cytometry. C, The purity of isolated tissue macrophages. IC, isotype control.**

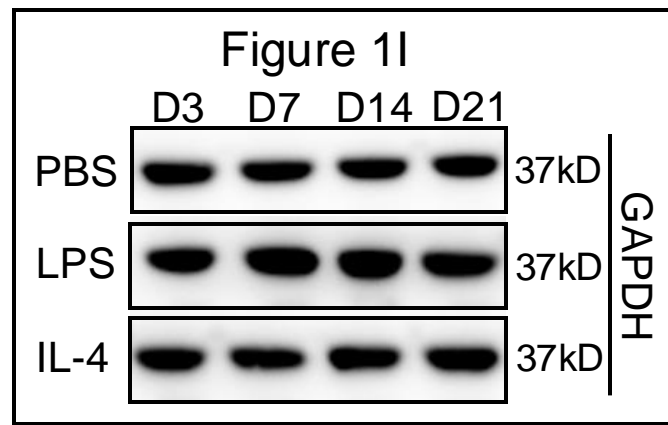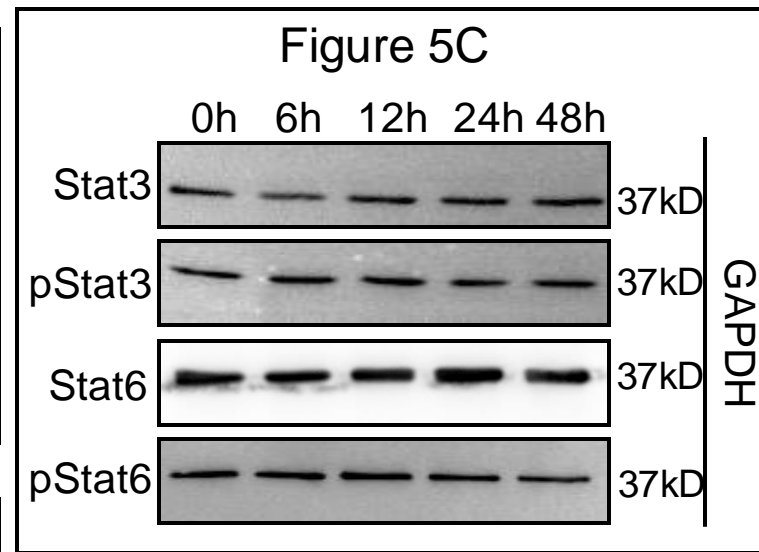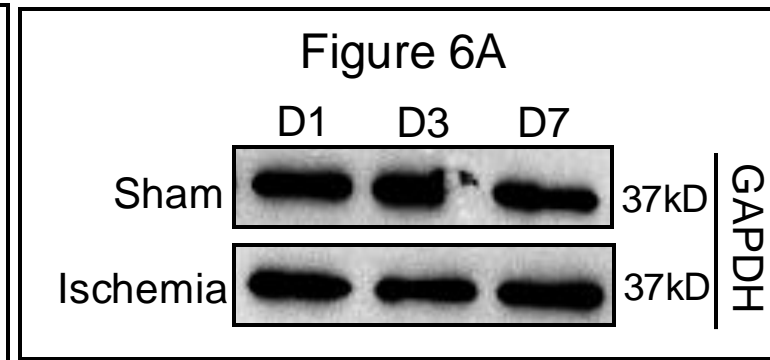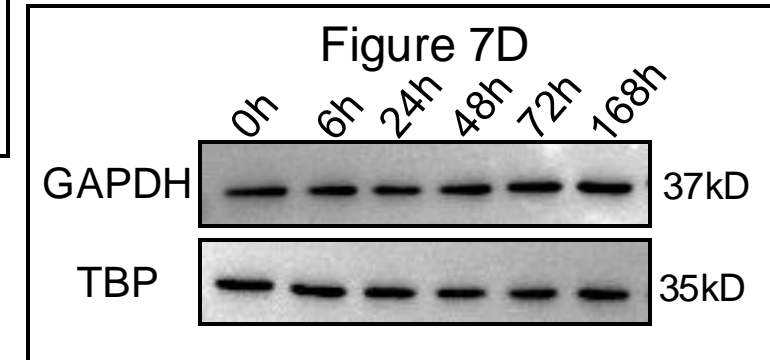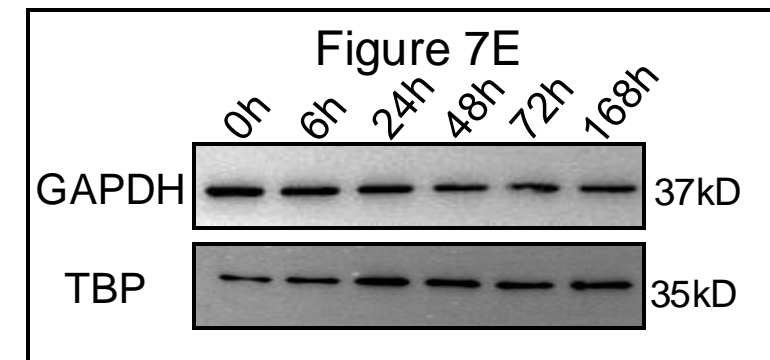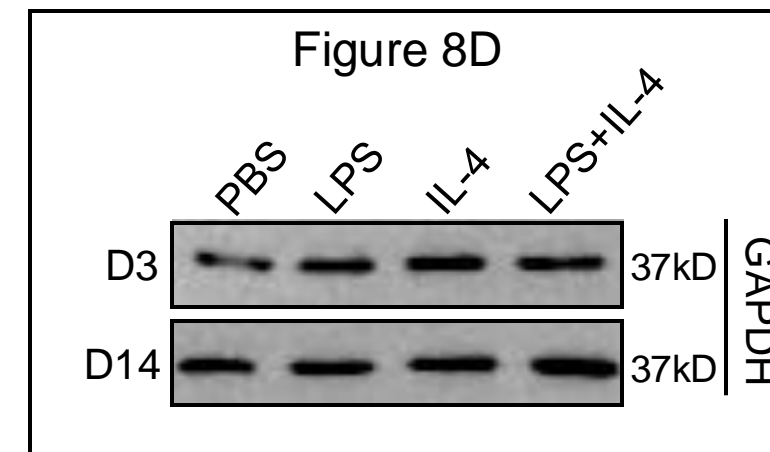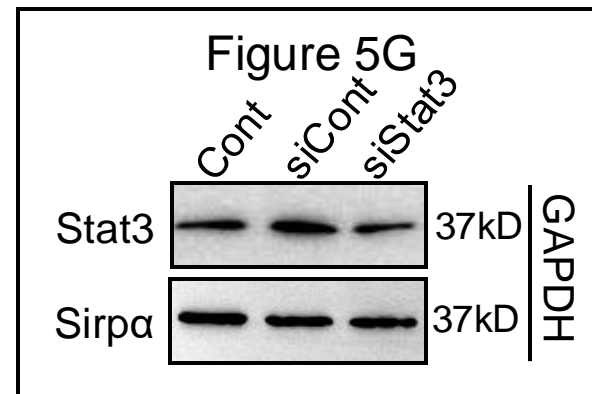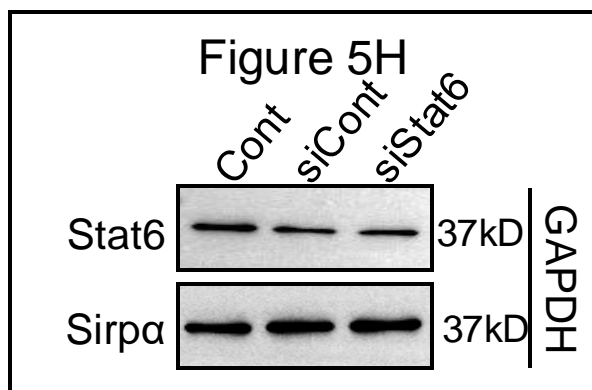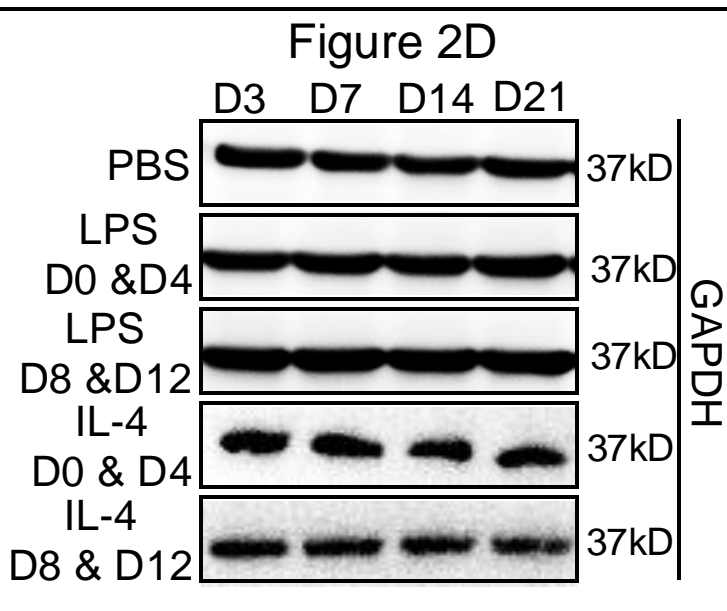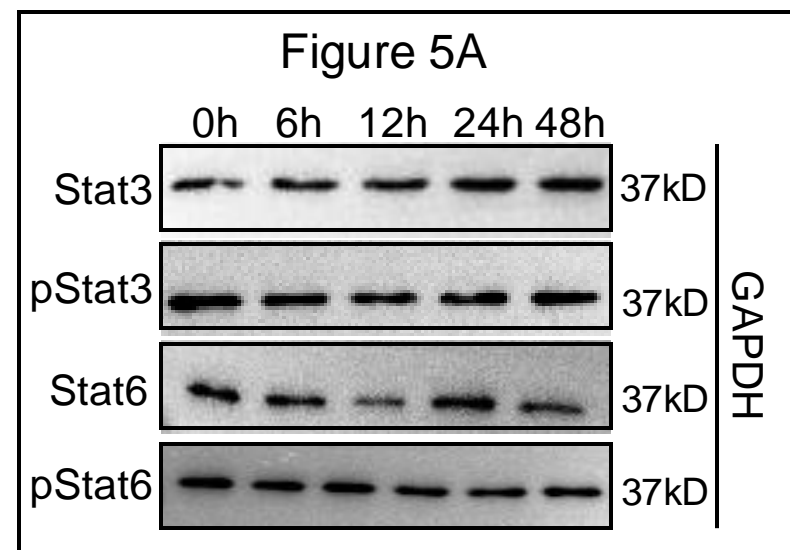

**sFigure 28.** GAPDH (37kD) or TBP (35kD) was used as a loading control respectively.
